# Supplementary material for: A triplex-forming linear probe for sequence-specific detection of duplex DNA with high sensitivity and affinity
Source: Royal Society of Chemistry journal article supplement (doi:10.1039/d0cc01865a), 2020-01-01
Supplement: d0cc01865a1.pdf [file d0cc01865a1.pdf]

## MATERIALS AND EXPERIMENTS

**Materials.** Phosphoramidite monomers (A, G, C, T), CPG columns, reagents for DNA synthesis, and Poly-Pak cartridges were obtained from Glen Research. Other reagents necessary for the syntheses of base surrogates were purchased from Tokyo Chemical Industry, Wako, and Aldrich. Unmodified DNA was purchased from Integrated DNA Technologies.

**Syntheses of probes.** All the fluorescent probes were synthesized on an ABI 3400 DNA/RNA Synthesizer using phosphoramidite monomers carrying natural nucleobases or **F**, **L**, **Q**, or **gQ**. Syntheses of phosphoramidite monomers **F**, **L**, and **Q** were reported previously.<sup>[1][2]</sup> After work-up, probes were purified by reversed-phase high-performance liquid chromatography (HPLC) and characterized using MALDI-TOF mass spectroscopy (Autoflex II, Bruker Daltonics). Mass spectrometry data are shown in the appendix.

**Spectroscopic measurements.** Fluorescence spectra were measured in microcells on a JASCO model FP-8500 equipped with a programmable temperature controller. Excitation wavelengths were 440 nm for fluorophore **F** and 455 nm for fluorophore **L**. In order to monitor emission at equilibrium, the fluorescence spectrum was measured after heating to 80 °C followed by a gradual decrease (4 °C min<sup>-1</sup>) of temperature to 20 °C in TBM (Tris-Borate Magnesium) buffer, pH 7.0 with 10, 100, or 1000 mM MgCl<sub>2</sub>). UV/Vis spectra were obtained with a Shimadzu UV-1800 by measuring absorbance spectra at 20 °C.

**Measurement of melting temperature ( $T_m$ ).** Melting curves were obtained with a Shimadzu UV-1800 by measuring the change of absorbance at 260 nm versus temperature. The  $T_m$  was determined from the maximum in the second derivative of the melting curve for Hoogsteen base pairs and in first derivative for the Watson-Crick base pairs. Both the heating and cooling curves were measured, and the reported  $T_m$  value is the average. The temperature ramp was 0.5 °C/min. Solution conditions were 1.0 μM TFO linear probe, 1.0 μM DNA-A or AR-as, 1.1 μM DNA-T or AR-s, 90 mM TBM buffer pH 7.0 with 10, 100, or 1000 mM MgCl<sub>2</sub>. It should be noted that addition of excess DNA-T ensures all DNA-A strands form duplex, which avoids the unintended hybridization to single stranded DNA-A (linear probe/DNA-A) while the detection.

**Plasmid construction.** The multiple cloning site in pcDNA 4/TO/myc-His C<sup>[3]</sup> was cut with restriction enzyme Xho I. The self-complementary insert (5'-TCGAAAAGAAGAAAAGAGAGAA-3'), which includes the target binding region and which is complementary to the ends resulting from Xho I cleavage was ligated in the plasmid using T4 DNA ligase. This yielded plasmids with various numbers of the repeat sequence. The newly constructed plasmids were transformed into competent *E. coli*, colonies were selected, amplified, and sequenced. Sequences of relevant regions of each plasmid are shown in Table S2 and the appendix.

**Primer design and PCR.** Primers were designed to hybridize near the target region. The predicted melting temperature was 69 °C as determined using the NEB  $T_m$  Calculator. The forward primer sequence was 5'-GCTCCCAGTAGGAATTCTGCAGATATCC-3', and the reverse primer sequence was 5'-CATAACGGTCATCATCACCATCACCAT-3'. For amplification, the protocol for Phusion® High-Fidelity DNA Polymerase (M0530) from NEW ENGLAND BioLabs was used. The reaction volume was 50 µL. The expected length of products for plasmids 0, 2, and 5 were 124, 168, and 232 base pairs, respectively. The general PCR program was as follows: Initial Denaturation (98 °C, 30 s)→[Denaturation (98 °C, 10 s)→Renaturation (69 °C, 30 s)→Extension (72 °C, product 0: 4 s, product 2: 5 s, product 5: 6 s)]\*n(Cycles)→Final extension (72 °C, 600 s)→Cooling (4 °C, hold). For the real-time PCR reaction the program was as follows: Initial Denaturation (98 °C, 30 s)→[Denaturation (98 °C, 30 s)→Renaturation (37 °C, 60 s, fluorescence measurement point)→Extension (72 °C, product 2: 5 s, product 5: 6 s)]\*n(Cycles)→Final extension (72 °C, 600 s)→Cooling (37 °C, hold). The amplification curves of qPCR were obtained with Roche LightCycler® 96 Instrument by measuring fluorescence emission at 514 nm. Excitation wavelength was 470 nm. Same PCR sample within probe solution (42.6 µM, 1.17 µl) and 5.0 µl glycerol was prepared before measurement.

**Native PAGE.** Probe **3L1gQ** (38.2 µM, 1.0 µl) and crude PCR product (8 µl) in 19 µl sterile water was mixed with 3.0 µl 10X loading buffer containing bromophenol blue (0.03%) and glycerol (60 vol%). Gels were stained with SYBR™ Gold and analyzed using a Typhoon FLA 9500 (GE Healthcare) by exciting with a 473-nm laser. On non-denaturing gels, we could detect perylene emission from the high-order complex (duplex or triplex).

[1] H. Kashida, N. Kondo, K. Sekiguchi, H. Asanuma, *Chem. Commun.* **2011**, 47, 6404–6406.

[2] H. Asanuma, H. Hayashi, J. Zhao, X. Liang, A. Yamazawa, T. Kuramochi, D. Matsunaga, Y. Aiba, H. Kashida, M. Komiyama, *Chem. Commun.* **2006**, 5062-5064

[3] H. Asanuma, M. Akahane, R. Niwa, H. Kashida, Y. Kamiya, *Angew. Chemie Int. Ed.* **2015**, 54, 4315–4319.

## Supporting Figures and Tables (Scheme S1-S2, Fig. S1-S12, Tables S1-S3)

### Synthesis of anthraquinone derivative: gQ phosphoramidite monomer

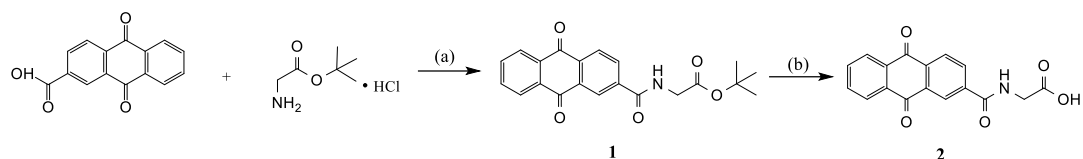

**Scheme S1.** Synthesis of anthraquinone with glycine linker, **gQ**. Reagent and conditions: a) EDC, HOBT, in DMF and Et<sub>3</sub>N, room temperature 3 h, 70.6%; b) triethylsilane, TFA, in CH<sub>2</sub>Cl<sub>2</sub>, room temperature, 3 h, 89.0%.

#### a) Synthesis of compound 1

Glycine tert-butyl ester hydrochloride (0.84 g, 5.0 mmol, 1.0 eq) dissolved in 20 mL DMF was added dropwise to Et<sub>3</sub>N (2.4 ml, 17.5 mmol, 3.5 eq) and stirred. Next, 1-hydroxybenzotriazole (1.22 g, 8.0 mmol, 1.6 eq), anthraquinone-2-carboxylic acid (1.26 g, 5.0 mmol, 1.0 eq), and 1-ethyl-3-(3-dimethylaminopropyl) carbodiimide hydrochloride (1.53 g, 8.0 mmol, 1.6 eq) in 15 ml DMF were added, and the solution was stirred for 3-4 hours. The product was extracted with AcOEt and washed twice with aqueous NaHCO<sub>3</sub>. The solvent was removed by evaporation to afford compound **1** (1.3 g, 3.5 mmol, yield: 70%). <sup>1</sup>H-NMR [CDCl<sub>3</sub>, 500 MHz] δ = 8.63 (d, *J* = 1.5 Hz, 1H), 8.35 (d, *J* = 8.0 Hz, 1H), 8.28 (m, 3H), 7.81 (m, 2H), 7.03 (t, *J* = 4.5 Hz, 1H), 4.20 (d, *J* = 5.0 Hz, 2H), 1.52 (s, 9H). <sup>13</sup>C-NMR [CDCl<sub>3</sub>, 125 MHz] δ = 182.4, 182.3, 168.9, 165.5, 138.8, 135.3, 134.42, 134.41, 133.5, 133.4, 133.0, 127.9, 127.42, 127.38, 125.3, 82.8, 42.7, 28.1. HRMS (FAB) Calcd for C<sub>21</sub>H<sub>19</sub>NO<sub>5</sub> (M) 365.1297; found 366.1270.

#### b) Synthesis of compound 2

To compound **1** (1.29 g, 3.5 mmol, 1.0 eq) dissolved in 10 ml CH<sub>2</sub>Cl<sub>2</sub> was added Et<sub>3</sub>N (1.40 ml, 8.8 mmol, 2.5 eq), the solution was stirred, and 20 mL TFA was added. After 4 hours with stirring, the solvent was removed by evaporation, and the product was dissolved in diethyl ether and isolated by filtration. Removal of the solvent by vacuum evaporation, yielded compound **2** (0.95 g, 3.1 mmol, yield: 89%). <sup>1</sup>H-NMR [DMSO, 500 MHz] δ = 9.35 (t, *J* = 6.0 Hz, 1H), 8.67 (s, 1H), 8.35 (dd, *J*<sub>1</sub> = 1.5 Hz, *J*<sub>2</sub> = 8.0 Hz, 1H), 8.30 (d, *J* = 8.0 Hz, 1H), 8.25 (m, 2H), 7.95 (m, 2H), 4.00 (d, *J* = 6.0 Hz, 2H). <sup>13</sup>C-NMR [DMSO, 125 MHz] δ = 182.6, 182.5, 171.5, 165.4, 139.0, 135.1, 133.6, 133.5, 133.4, 133.3, 129.3, 128.7, 127.3, 127.0, 126.0, 125.8, 41.8. HRMS (FAB) Calcd for C<sub>17</sub>H<sub>11</sub>NO<sub>5</sub> (M+H<sup>+</sup>) 310.0715; found 310.0662.

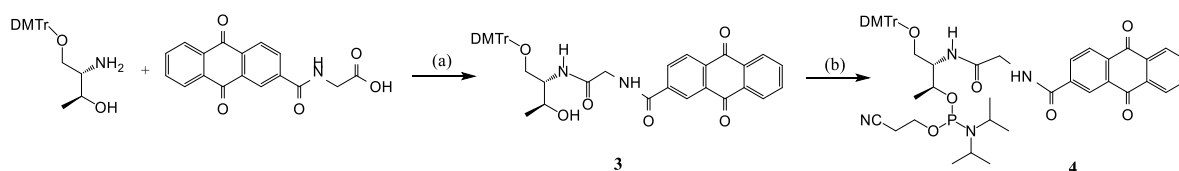

**Scheme S2.** Synthesis of **gQ** on D-threoninol scaffold. Reagent and conditions: a) DCC, HOBT, in DMF, room temperature overnight, 99%; b) (iPr)<sub>2</sub>NP(O)(Cl)(OCH<sub>2</sub>CH<sub>2</sub>CN), Et<sub>3</sub>N, CH<sub>2</sub>Cl<sub>2</sub>, N<sub>2</sub> 0 °C → room temperature, 1 h, 56%.

#### c) Synthesis of compound 3

Anthraquinone-2-carboxylic acid (0.37 g, 1.2 mmol, 1.2 eq) was coupled with DMT-D-threoninol (1.00 mmol) in the presence of dicyclohexylcarbodiimide (0.25 g, 1.2 mmol) and 1-hydroxybenzotriazole (0.18 g, 1.2 mmol) in 50 mL DMF. The reaction was stirred at room temperature overnight, and the product was extracted with 200 mL AcOEt and isolated by filtration. The product was washed twice with saturated aqueous NaHCO<sub>3</sub> and twice with saturated aqueous NaCl to remove unreacted reagents, and dried over MgSO<sub>4</sub>. The solvent was removed by evaporation, and the product was purified by silica gel column chromatography (CHCl<sub>3</sub>: Et<sub>3</sub>N = 100:3 → CHCl<sub>3</sub>: CH<sub>3</sub>OH : Et<sub>3</sub>N = 95:5:3) to afford **3** (0.99 mmol, yield 99%). <sup>1</sup>H-NMR [CDCl<sub>3</sub>, 500 MHz] δ = 8.65 (d, *J* = 1.0 Hz, 1H), 8.27-8.19(m, 4H), 8.00(t, *J* = 5.0 Hz, 1H), 7.77 (tdd, *J*<sub>1</sub> = 2.0 Hz, *J*<sub>2</sub> = 7.5 Hz, *J*<sub>3</sub> = 10.5 Hz, 2H), 7.37 (m, 2H), 7.25-7.20(m, 6H), 7.14-7.09 (m, 2H), 6.76 (dd, 4H), 4.35 (dd, *J*<sub>1</sub> = 5.0 Hz, *J*<sub>2</sub> = 16.5 Hz, 1H), 4.10-4.13(m, 2H), 4.06 (m, 1H), 3.71 (d, *J* = 0.5 Hz, 6H), 3.39 (dd, *J*<sub>1</sub> = 5.0 Hz, *J*<sub>2</sub> = 9.5 Hz, 1H), 3.28 (dd, *J*<sub>1</sub> = 4.0 Hz, *J*<sub>2</sub> = 9.5 Hz, 1H), 1.15 (d, *J* = 6.0 Hz, 3H). <sup>13</sup>C-NMR [CDCl<sub>3</sub>, 125 MHz] δ = 182.25, 182.24, 169.5, 165.8, 158.5, 144.4, 138.4, 135.6, 135.5, 135.1, 134.4, 134.3, 133.24, 133.22, 133.18, 133.05, 129.9, 128.0, 127.9, 127.6, 127.4, 127.2, 126.9, 125.8, 113.2, 86.5, 67.8, 64.1, 55.2, 54.6, 46.0, 44.0, 20.1, 9.91. HRMS (FAB) Calcd for C<sub>42</sub>H<sub>38</sub>N<sub>2</sub>O<sub>8</sub>(M) 698.2628. Found 697.4104

#### d) Synthesis of compound 4

Et<sub>3</sub>N (0.48 ml, 3.6 mmol, 5 eq) and 2-cyanoethyl-diisopropylchlorophosphoramidite (0.32 ml, 1.4 mmol, 2 eq) were added to a solution of compound **3** (0.50 g, 0.72 mmol) in CH<sub>2</sub>Cl<sub>2</sub> (3.0 ml) at 0 °C. The mixture was stirred 20 min at 0 °C and then for 40 min at room temperature under nitrogen. CHCl<sub>3</sub> was added to the reaction mixture, and the solvent was removed by evaporation. Silica gel column chromatography (AcOEt : Hexane: Et<sub>3</sub>N = 33: 66: 3 → 50: 50: 3) afforded **4** (0.37 g, 0.40 mmol, yield 56%). <sup>1</sup>H-NMR [CDCl<sub>3</sub>, 500 MHz] δ = 8.67 (m, 1H), 8.22-8.19 (m, 4H), 8.00-7.87 (m, 1H), 7.77 (m, 2H), 7.42 (m, 2H), 7.31-7.15 (m, 7H), 6.80-6.76 (m, 4H), 6.60-6.46 (m, 1H), 4.37 (m, 1H), 4.28-4.12 (m, 3H), 3.71-3.62 (m, 6H), 3.57-3.41 (m, 4H), 3.34-3.16 (m, 2H), 2.59-2.41 (m, 2H), 1.22 (m, 3H), 1.12-0.92 (m, 12H). <sup>13</sup>C-NMR [CDCl<sub>3</sub>, 125 MHz] δ = 180.5, 180.3, 167.1, 167.0, 163.8, 156.6, 142.9, 142.8, 136.70, 136.65, 134.13, 134.05, 134.03, 133.3, 132.5, 131.6, 131.5, 131.4, 131.1, 131.0, 128.3, 128.22, 128.15, 126.4, 126.3, 126.0, 125.8, 125.47, 125.45, 125.0, 124.0, 123.9, 116.5, 116.2,

111.22, 111.20, 84.4, 84.3, 67.6, 67.5, 66.7, 66.6, 61.0, 60.6, 56.4, 56.3, 56.1, 56.0, 53.3, 52.8, 52.7, 51.7, 42.1, 42.0, 41.3, 41.2, 22.83, 22.77, 22.5, 22.4, 18.53, 18.48, 17.82, 17.80. <sup>31</sup>P-NMR [CDCl<sub>3</sub>, 121 MHz] δ = 148.0, 147.6. HRMS (FAB) Calcd for C<sub>51</sub>H<sub>55</sub>N<sub>4</sub>O<sub>9</sub>(M+H<sup>+</sup>) 899.3785; found 899.3034.

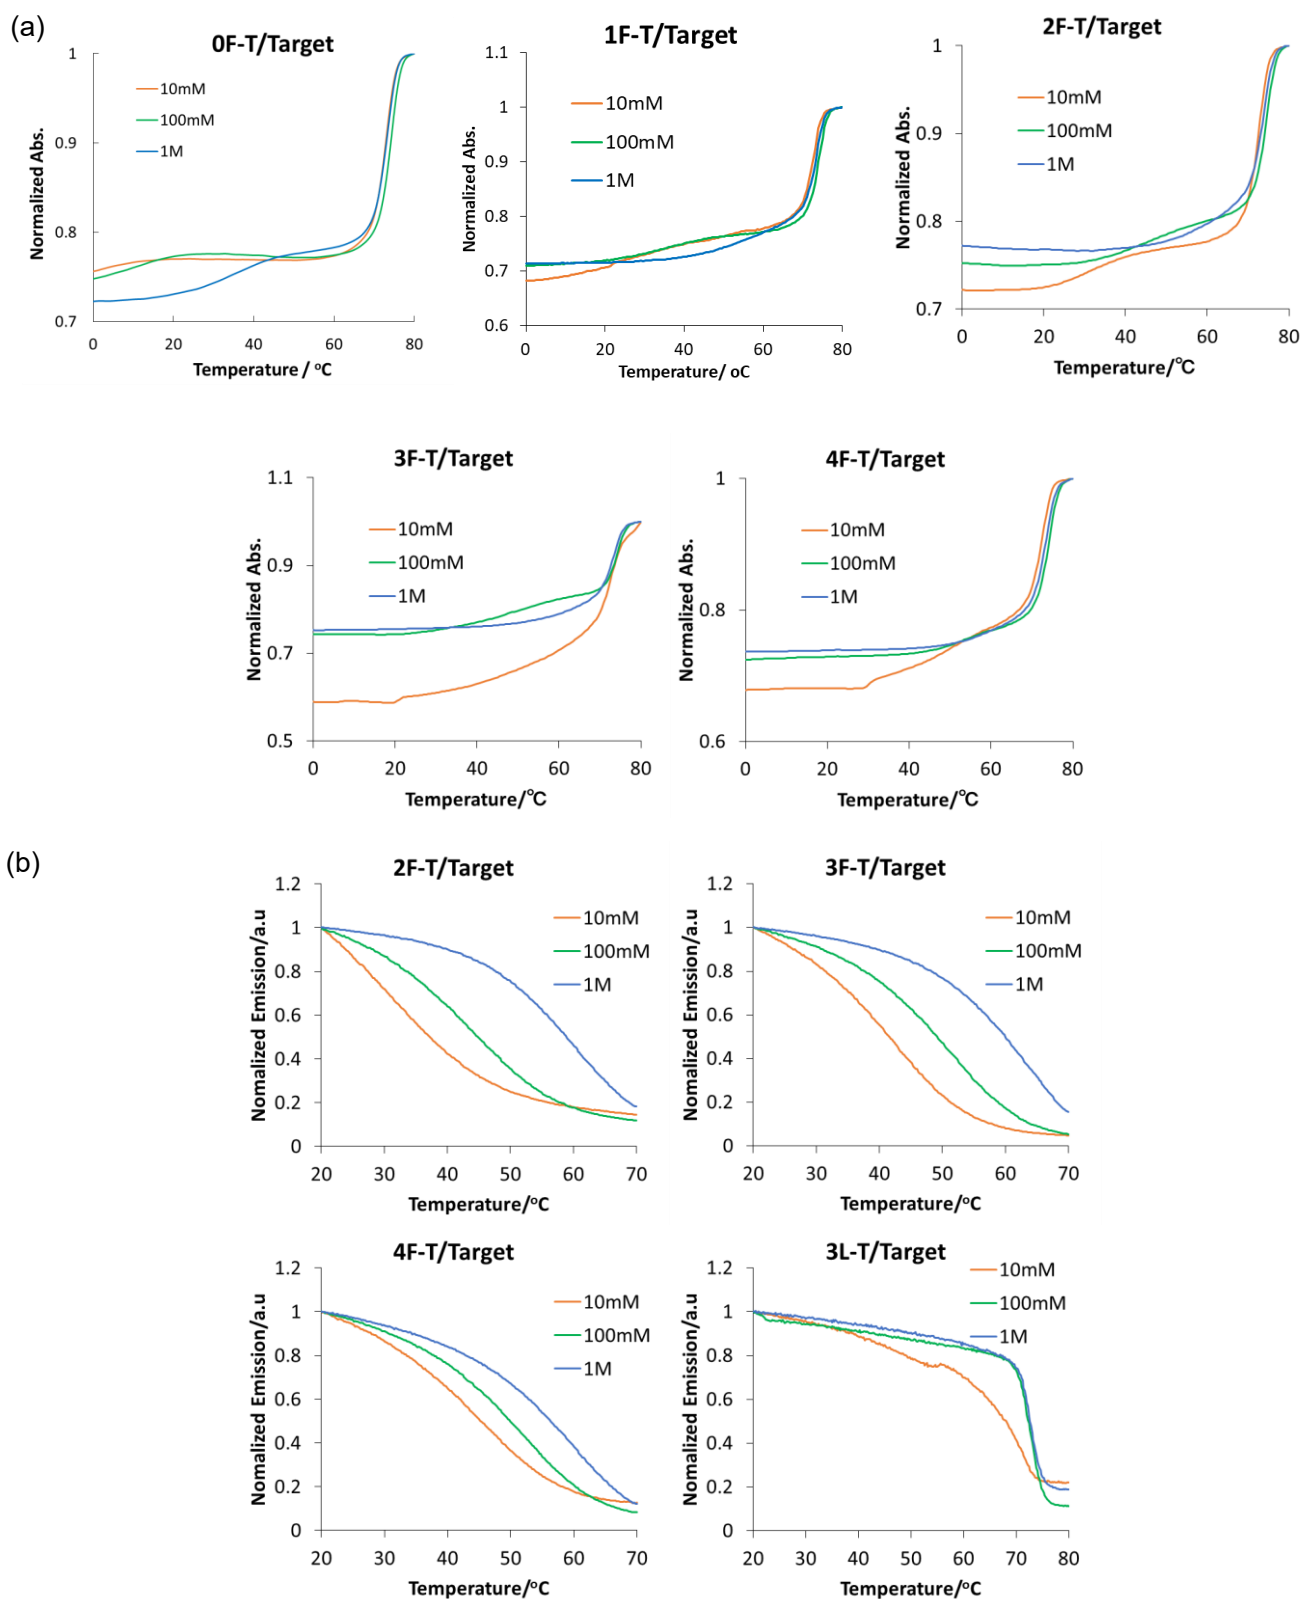

**Figure S1.** (a) UV-melting curves and (b) fluorescence-melting curves. Conditions: 1.0  $\mu$ M indicated TFO linear probe and DNA-A, 1.1  $\mu$ M DNA-T in 90 mM TBM buffer, pH 7.0 with 10 mM, 100 mM, or 1 M MgCl<sub>2</sub>, 80  $^{\circ}$ C -indicated temperature  $^{\circ}$ C, 0.5  $^{\circ}$ C / min. For F-type perylene, excitation wavelength: 440 nm. For L-type perylene, excitation wavelength: 455 nm.

**Table S1.** Calculated  $T_m$  values ( $^{\circ}\text{C}$ ) of the triplex formations

| Linear probe | 10mM            | 100mM | 1M   |
|--------------|-----------------|-------|------|
| 0F-T         | n.d             | n.d   | 35.8 |
| 1F-T         | 17.4            | 32.7  | 55.3 |
| 2F-T         | 32.5            | 44.5  | 59.6 |
| 3F-T         | 42.6            | 53.1  | 63.9 |
| 4F-T         | 44.4            | 52.1  | 60.1 |
| 3L-T         | 65 <sup>a</sup> | 72.7  | 72.7 |
| 0L-X         | 40.2            | 40.0  | n.d  |
| 3L-X         | n.d             | 62.7  | 60.7 |
| 3L1gQ        | 65.3            | 61.9  | 60.6 |

a. The  $T_m$  value was estimated from intensity, because the melting curve did not show a clear transition.

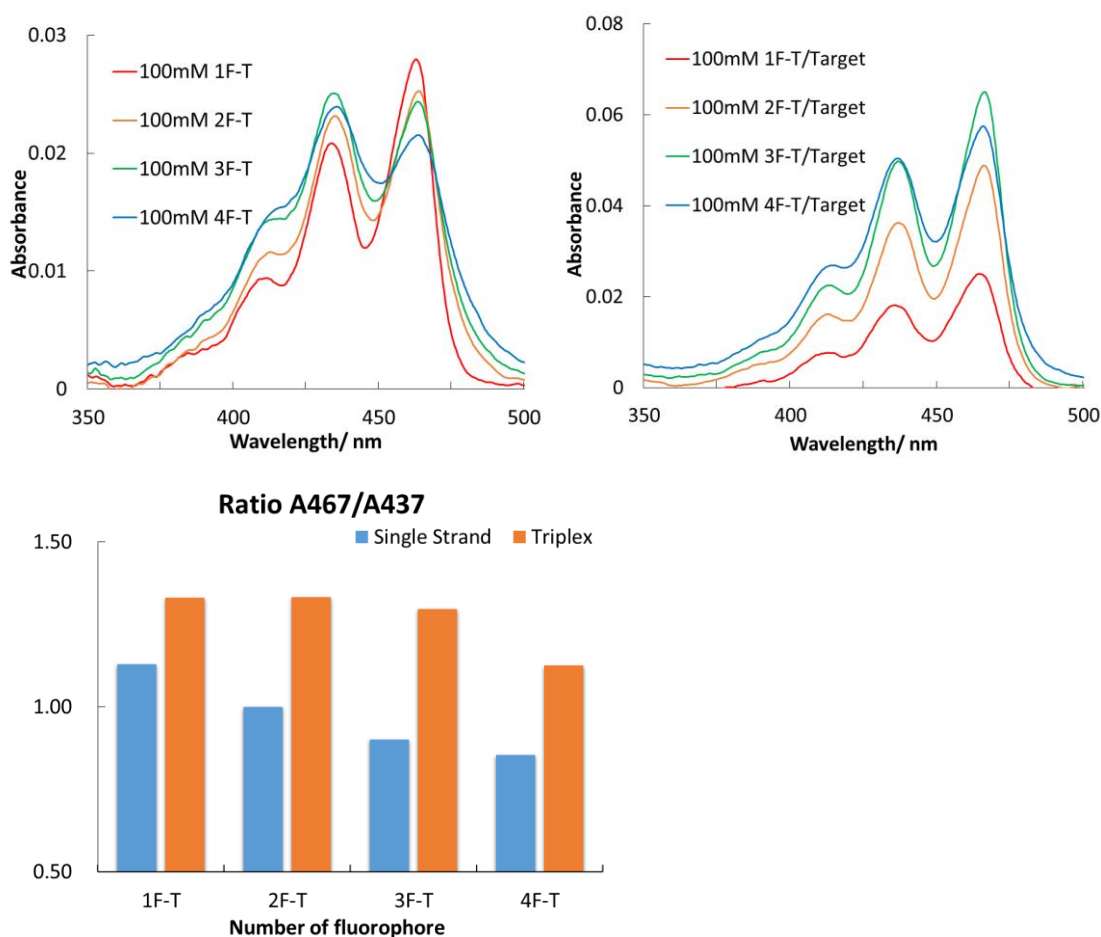

**Figure S2.** UV-Vis spectra of TFO linear probes. Conditions: 1.0  $\mu\text{M}$  TFO linear probe, 1.0  $\mu\text{M}$  DNA-A and 1.1  $\mu\text{M}$  DNA-T in 90 mM TBM buffer, pH 7, 100 mM  $\text{MgCl}_2$ , 20  $^{\circ}\text{C}$ . In the absorption spectra, the A467/A437 ratio of the triplex was the same for triplexes with **1F-T**, **2F-T**, and **3F-T**, in which perylenes are separated by nucleobases via intercalation. The lower A467/A437 ratio in the triplex of **4F-T** suggests that interaction between perylenes in the triplex state suppressed emission intensity.

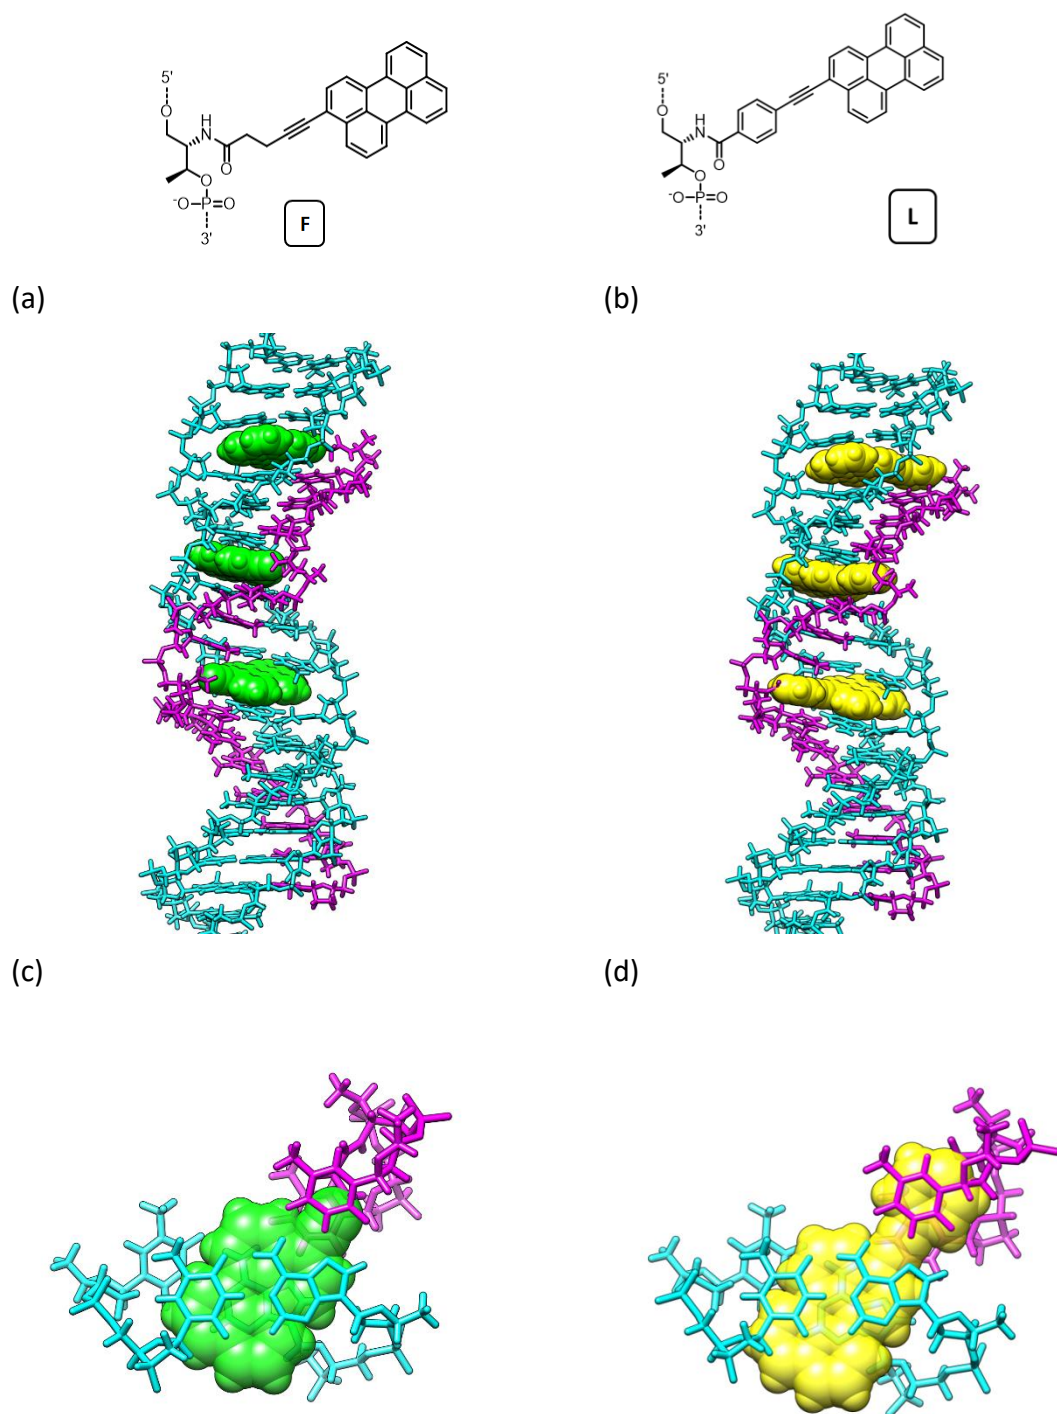

**Figure S3.** Energy minimized structures of triplexes of (a) **3F-T**/dsDNA and (b) **3L-T**/dsDNA. (c and d) Enlarged views of the structure in a and b. The dsDNA, probe strand, and perylenes are presented as cyan, magenta, and green/yellow respectively.



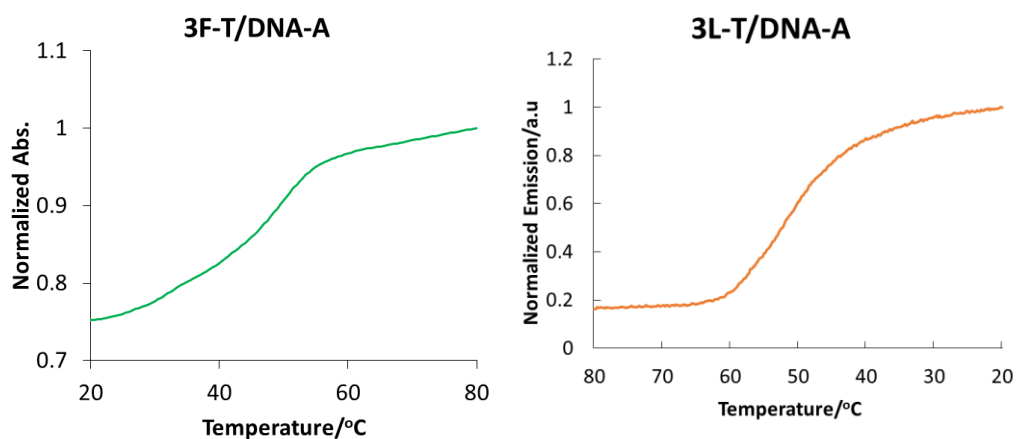

(a)

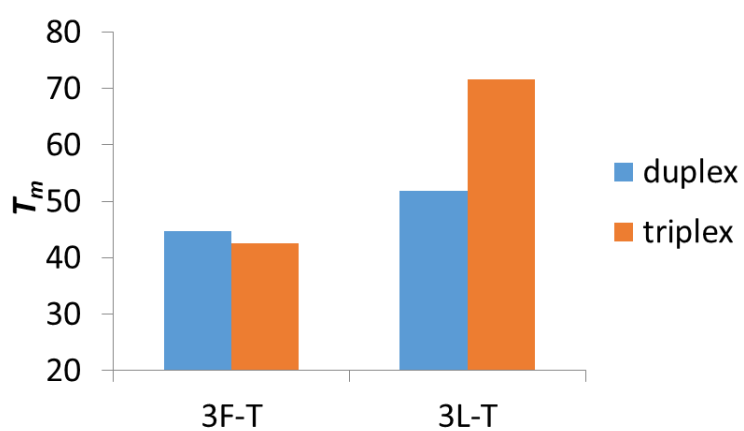

(b)

**Figure S4.** (a) UV-melting curve of **3F-T/DNA-A** and fluorescence-melting curve **3L-T/DNA-A**. (b)  $T_m$  comparison between triplex and linear probe/DNA-A duplex. Conditions: 1.0  $\mu\text{M}$  TFO linear probe, 1.0  $\mu\text{M}$  DNA-A, and 1.1  $\mu\text{M}$  DNA-T in 90 mM TBM buffer, pH 7.0, 10 mM  $\text{MgCl}_2$ .  $T_m$  values: **3F-T/DNA-A**, 44.8  $^\circ\text{C}$ ; **3F-T/Target duplex**, 42.6  $^\circ\text{C}$ ; **3L-T/DNA-A**, 51.8  $^\circ\text{C}$ ; **3L-T/Target duplex**, 72.7  $^\circ\text{C}$ . Excitation wavelengths were 440 nm for F-type perylene and 455 nm for L-type perylene.

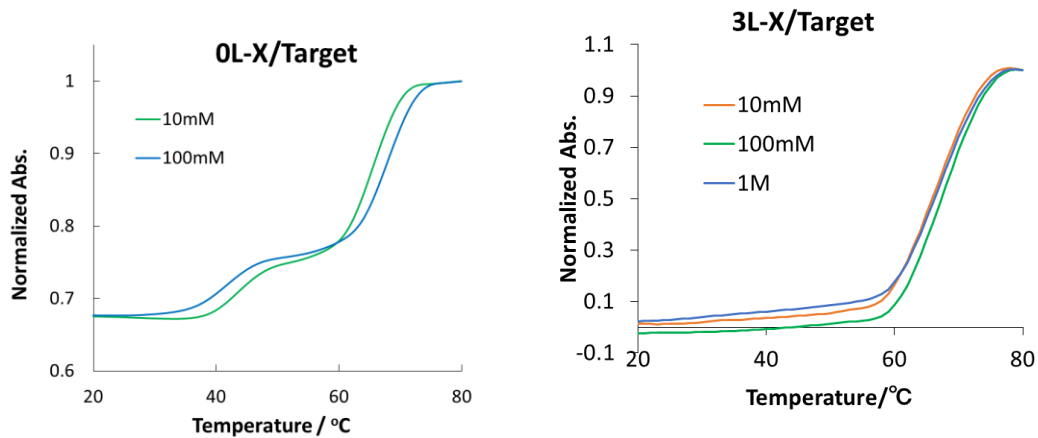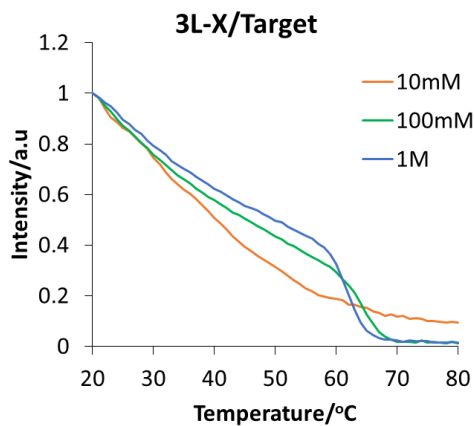

**Figure S5.** UV-melting and Fluorescence-melting curves. Conditions: 1.0  $\mu\text{M}$  TFO linear probes, 1.0  $\mu\text{M}$  AR-as and 1.1  $\mu\text{M}$  AR-s in 90 mM TBM buffer, pH 7.0 with indicated concentration of  $\text{MgCl}_2$ , 80-20  $^\circ\text{C}$ , 0.5  $^\circ\text{C}$  / min. Excitation wavelength: 455 nm.

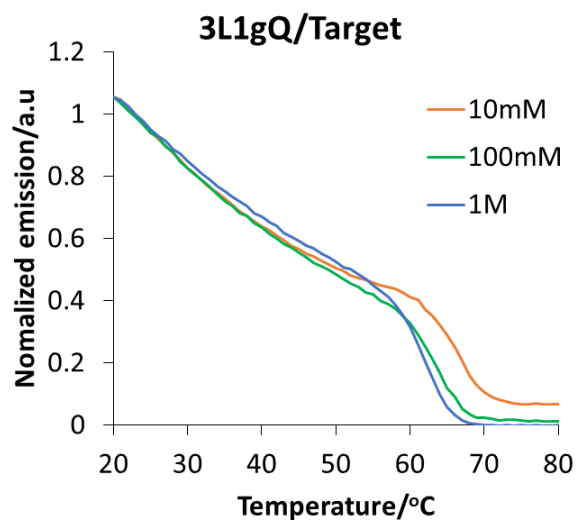

**Figure S6.** Fluorescence-melting curves of **3L1gQ/Target** duplex. Conditions: 1.0  $\mu\text{M}$  TFO linear probe and AR-as, 1.1  $\mu\text{M}$  AR-s in 90 mM TBM buffer, pH 7.0 with 10 mM, 100 mM, or 1 M  $\text{MgCl}_2$ , 80  $^\circ\text{C}$  -20  $^\circ\text{C}$ , 0.5  $^\circ\text{C}$  / min. Excitation wavelength: 455 nm

**Table S2.** Sequence design incorporating **Q**

| Target     | DNA-A  | 5'-CGTCGGTTT-AAAAAAAAAAAAA-TTTCGTGGC-3'  |
|------------|--------|------------------------------------------|
| DNA duplex | DNA-T  | 3'-GCAGCCAAA-TTTTTTTTTTTTTT-AAAGCACCG-5' |
| Probes     | 3F-T   | 5'-FTTTFTTTFTTTTTTTT-3'                  |
|            | 1Q3F   | 5'-QTTTFTTTFTTTFTTTT-3'                  |
|            | 2Q3F   | 5'-QTTTFTTTFTTTFTTTTQ-3'                 |
|            | 2Q3F-2 | 5'-QTTTFTTTFTTTFTTTQT-3'                 |

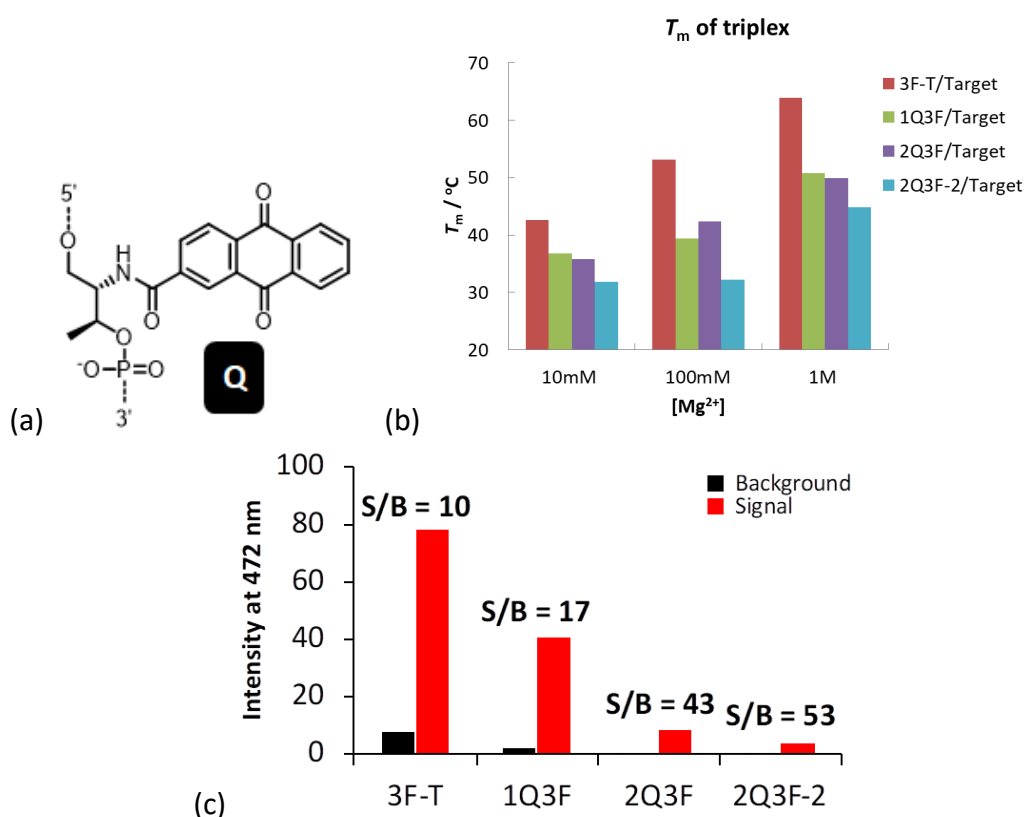

**Figure S7** (a) Chemical structure of anthraquinone **Q**. (b)  $T_m$ s of triplexes of TFO linear probes with target dsDNA. Conditions: 1.0  $\mu$ M TFO linear probe, 1.0  $\mu$ M DNA-A and 1.1  $\mu$ M DNA-T in 90 mM TBM buffer, pH 7.0, and 10 mM, 100 mM, and 1 M  $MgCl_2$ . (c) Emission intensities at 472 nm and S/B ratios. Conditions: 1.0  $\mu$ M TFO linear probe, 1.0  $\mu$ M DNA-A and 1.1  $\mu$ M DNA-T in 90 mM TBM buffer, pH 7.0, 100 mM  $MgCl_2$ , 20  $^{\circ}C$ . Excitation wavelength: 440 nm.

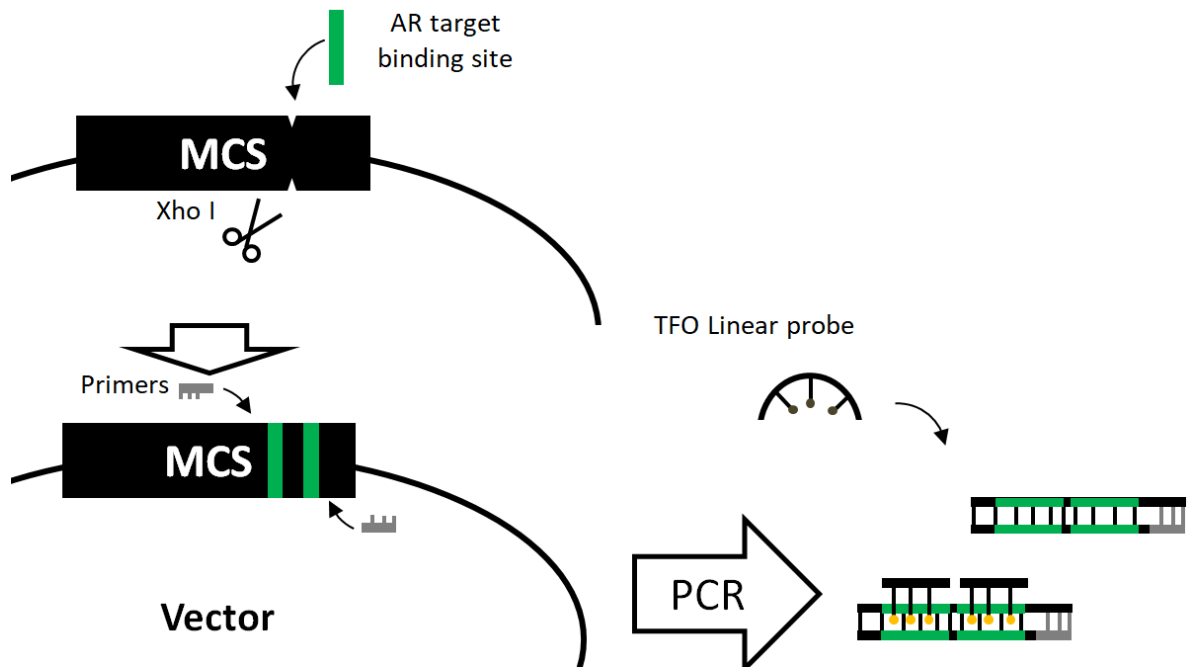

**Figure S8.** Scheme of plasmid construction.

**Table S3.** Sequence of PCR products containing AR gene sequence. Underlining indicates Xho I restriction site; sequence in red font is AR gene sequence.

| Product   | Sequence                                                                                                                                            |
|-----------|-----------------------------------------------------------------------------------------------------------------------------------------------------|
| Product 0 | ...5'-CAGTGGCGGCCGCTCGAGGTCACCCA-3'...                                                                                                              |
| Product 1 | ...5'-CAGTGGCGGCCGCTCGATTCTCTCTTTTCTTCTTTTCGAGGTCACCCA-3'...                                                                                        |
| Product 2 | ...5'-CAGTGGCGGCCGCTCGATTCTCTCTTTTCTTCTTTTCGATTCTCTCTTTTCTTCTTTTCGAGGTCACCCA-3'...                                                                  |
| Product 5 | ...5'-CAGTGGCGGCCGCTCTTCTCTCTTTTCTTCTTTTCGAAAAGAAGAAAAGAGAGAATCGATTCTCTCTTTTCTTCTTTTCGAAAAGAAGAAAAGAGAGAATCGAAAAGAAGAAAAGAGAGAAATCGAGGTCACCCA-3'... |

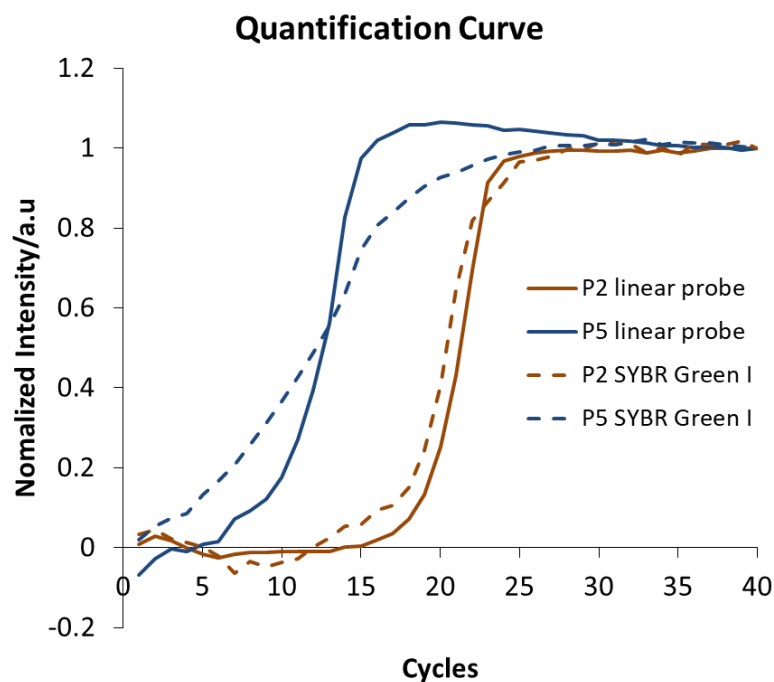

**Figure S9.** Amplification curves of real-time PCR. Conditions: 1  $\mu\text{M}$  **3L1gQ** or SYBR green I, 5  $\mu\text{L}$  glycerol in 50  $\mu\text{L}$  PCR sample. Excitation wavelength: 470 nm, emission wavelength: 514 nm.

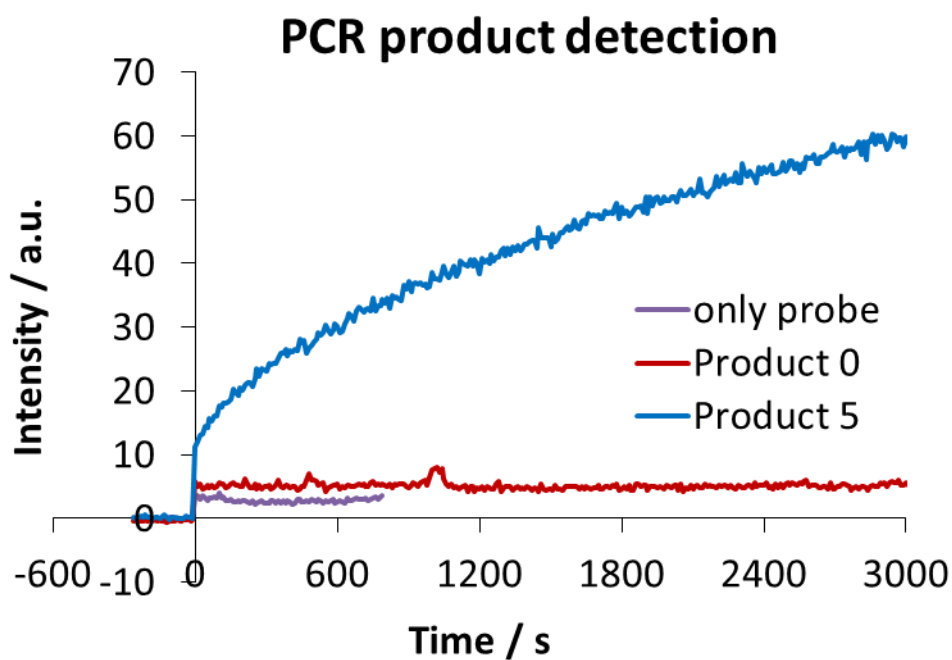

**Figure S10.** Fluorescence emission at 514 nm after **3L1gQ** was added to PCR product. Conditions: 100 nM **3L1gQ**, 20 nM purified product from amplification of plasmid 5 (100 nM target sites) or 20 nM purified product from amplification of plasmid 0. Conditions: 200  $\mu\text{L}$  90 mM TBM buffer, pH 7.0, 100 mM  $\text{MgCl}_2$ , 20  $^\circ\text{C}$ . Excitation wavelength: 455 nm, emission wavelength: 514 nm.

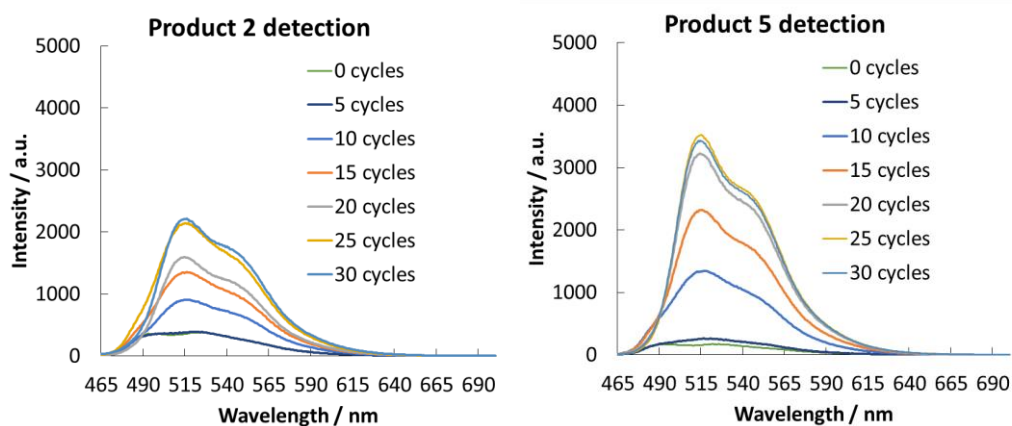

**Figure S11.** Fluorescence spectra of PCR products from amplification of plasmid 2 (left) and plasmid 5 (right) after indicated numbers of cycles. Conditions: 1.0  $\mu$ M linear probe, 50  $\mu$ L PCR product, 9 vol% glycerol in 150  $\mu$ L 90 mM TBM buffer, pH 7.0 and 100 mM  $MgCl_2$ , 20  $^{\circ}C$ . Excitation wavelength: 455 nm.

| Lane                 | 1 | 2 | 3 | 4 | 5 | 6 |
|----------------------|---|---|---|---|---|---|
| Linear probe (3L1gQ) | - | + | - | + | - | + |
| product 0            | + | + | - | - | - | - |
| product 5            | - | - | + | + | - | - |
| product 2            | - | - | - | - | + | + |

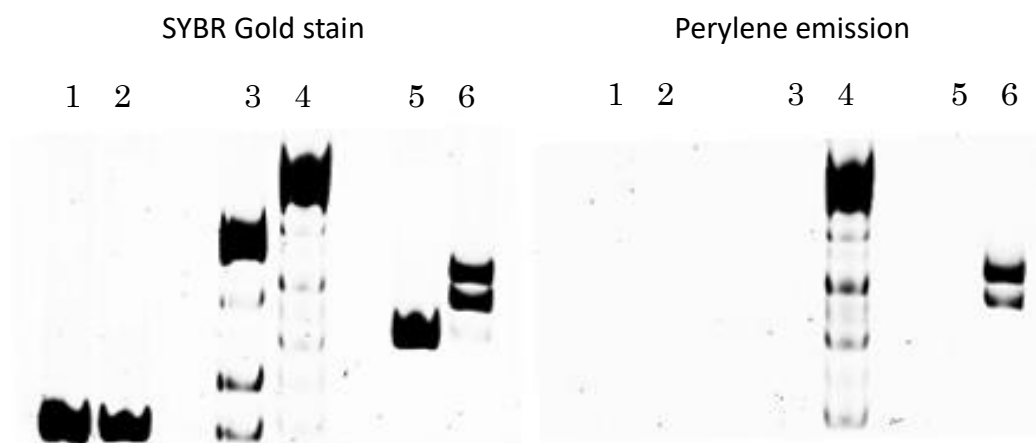

**Figure S12.** Native PAGE of PCR products. Fluorescence of perylene was recorded before staining by SYBR Gold.

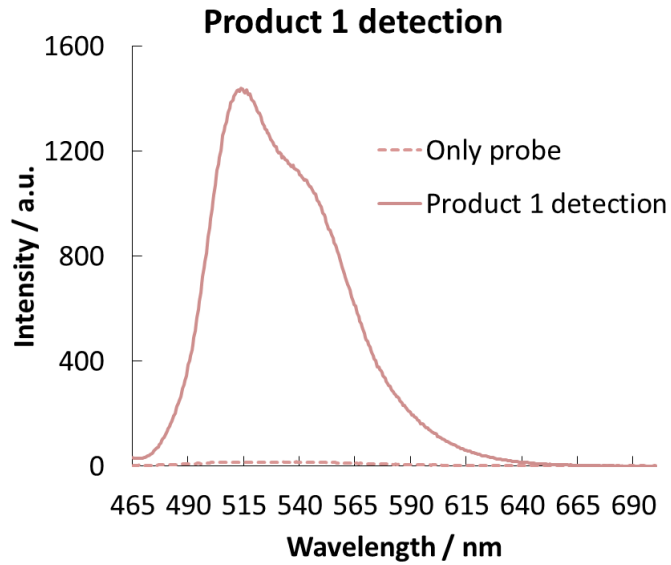

**Figure S13.** Direct fluorescence detection of dsDNA after PCR. Conditions: 1.0  $\mu\text{M}$  **3L1gQ**, 50  $\mu\text{L}$  crude PCR product, 9 vol% glycerol within 90 mM TB buffer, pH 7.0 with 100 mM  $\text{MgCl}_2$  in a final volume of 200  $\mu\text{L}$ , 20  $^\circ\text{C}$ . ex. = 455 nm, sensitivity: high.

**Table S4.** Sequence of mismatch *AR* gene sequence. (Red font indicates the MM site)

| Sequence |          |                                               |
|----------|----------|-----------------------------------------------|
| Probe    | 3L1gQ    | 5'-LTTTLCTTLCTTTTCgQTCTCTT-3'                 |
| 1MM      | 1MM-ARas | 5'-CTACT-AAAGAAGAAA <b>G</b> GAGAGAA-GAATC-3' |
|          | 1MM-ARs  | 3'-GATGA-TTTCTTCTTT <b>C</b> CTCTCTT-CTTAG-5' |
| 2MM      | 2MM-ARas | 5'-CTACT-AAAGAAGAA <b>GG</b> GAGAGAA-GAATC-3' |
|          | 2MM-ARs  | 3'-GATGA-TTTCTTCTT <b>CC</b> CTCTCTT-CTTAG-5' |

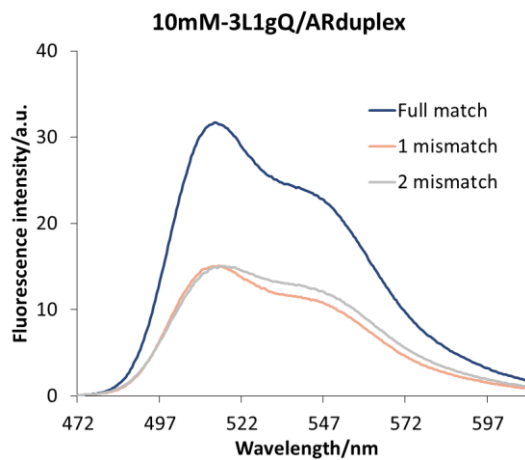

**Figure S14.** Fluorescence spectra while **3L1gQ** detecting full-match *AR* gene, 1MM-*AR* gene and 2MM-*AR* gene, respectively. Condition: 1.0  $\mu\text{M}$  **3L1gQ** and 1 $\mu\text{M}$  indicated *AR*-as, 1.1 $\mu\text{M}$  indicated *AR*-s in 90 mM TBM buffer ( $\text{MgCl}_2$ = 10 mM), pH 7.0, ex.=455 nm, sensitivity: low.

(a)

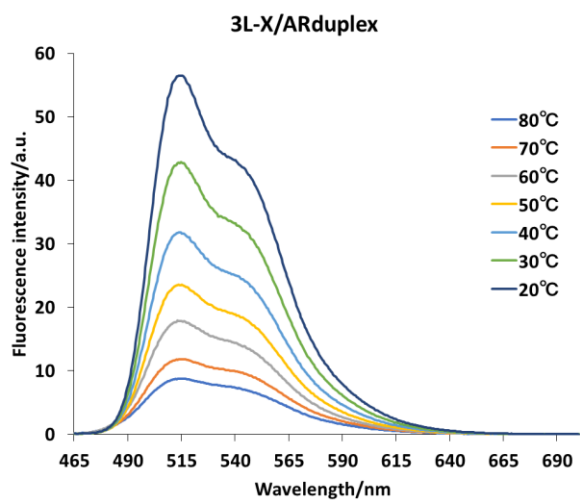

(b)

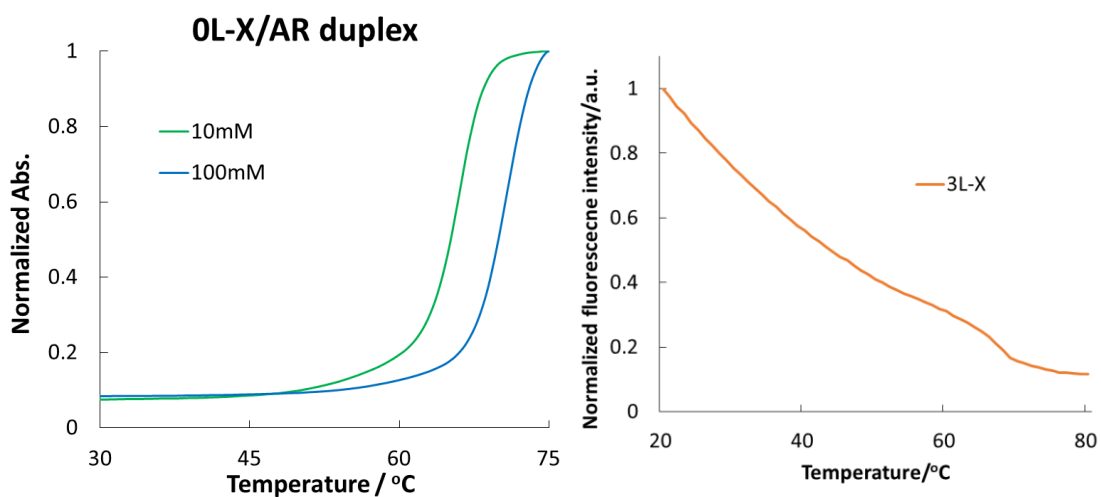

**Figure S15.** (a) Fluorescence spectra of **3L-X** under pH 5.5. (b) UV-melting curves of 0L-X/AR duplex (left) and fluorescence-melting curve (right) of **3L-X**/AR duplex in the MES buffer. Condition: 1.0  $\mu\text{M}$  indicated linear probe and AR-as, 1.1  $\mu\text{M}$  AR-s in 90 mM MES buffer, pH 5.5 with 100mM  $\text{MgCl}_2$ , 80-20  $^\circ\text{C}$ , 0.5  $^\circ\text{C}$  / min, sensitivity: low.



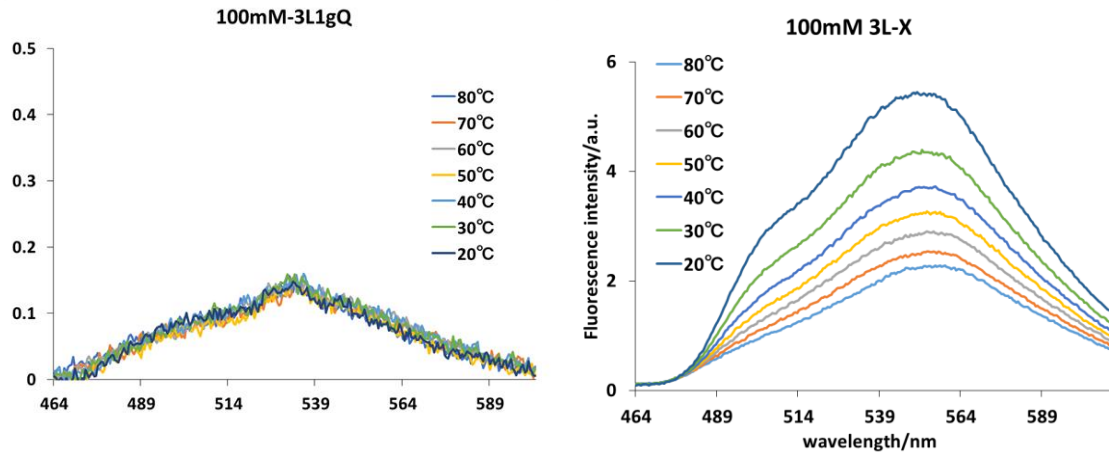

**Figure S16.** Fluorescence spectra of sing-stranded linear probe **3L1gQ** (left) and **3L-X** (right). Condition: 1.0  $\mu\text{M}$  indicated linear probe in 90 mM TB buffer, pH 7.0 with 100 mM  $\text{MgCl}_2$ , ex.=455 nm, sensitivity: low.

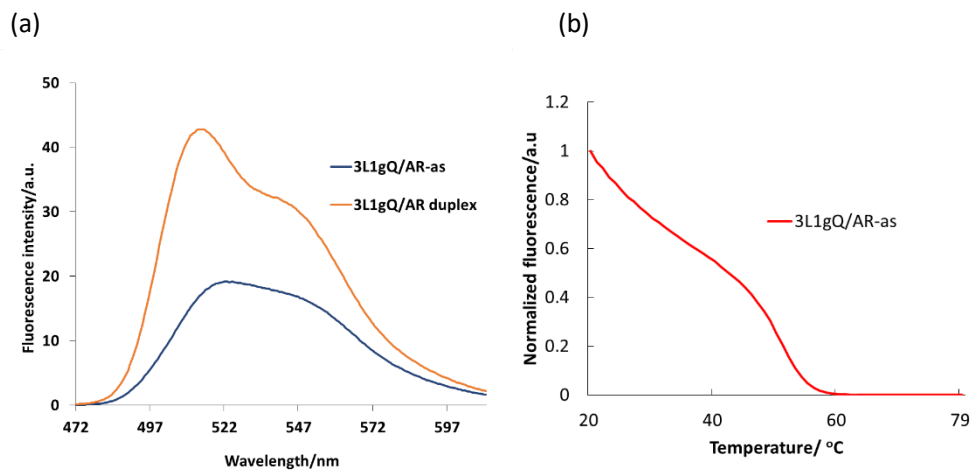

**Figure S17.** (a) Fluorescence spectra of indicated complex: 3L1gQ/AR-as (blue) and triplex: 3L1gQ/AR-as/AR-s (orange). (b) Fluorescence-melting curve of 3L1gQ/AR-as duplex. Condition: 1.0  $\mu\text{M}$  **3L1gQ** and 1 $\mu\text{M}$  indicated AR-as, 1.1 $\mu\text{M}$  indicated AR-s in 90 mM TBM buffer ( $\text{MgCl}_2=100$  mM), pH 7.0 with, ex.=455 nm, sensitivity: low.

### 3. Appendix

#### 3-1 NMR spectra

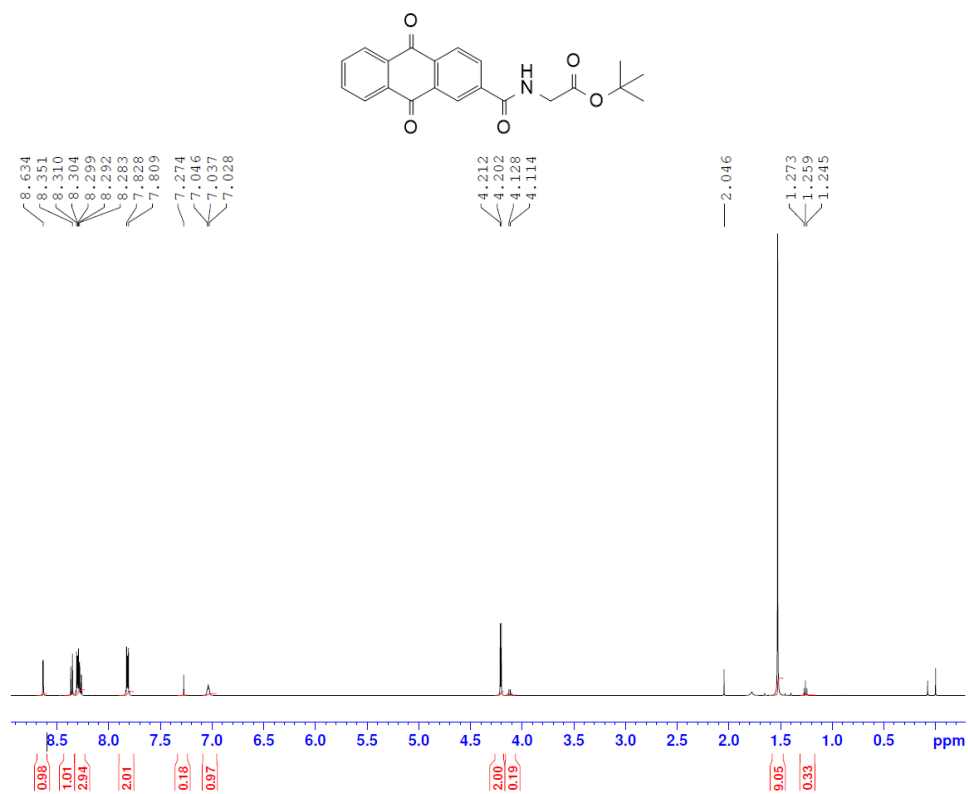

#### <sup>1</sup>H-NMR spectrum of 1

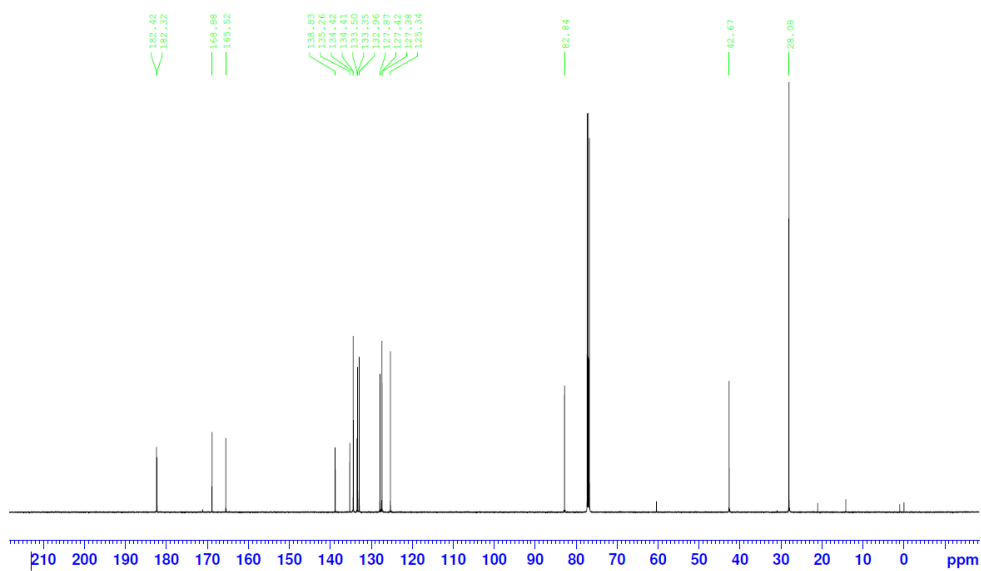

#### <sup>13</sup>C-NMR spectrum of 1

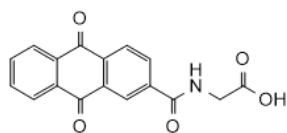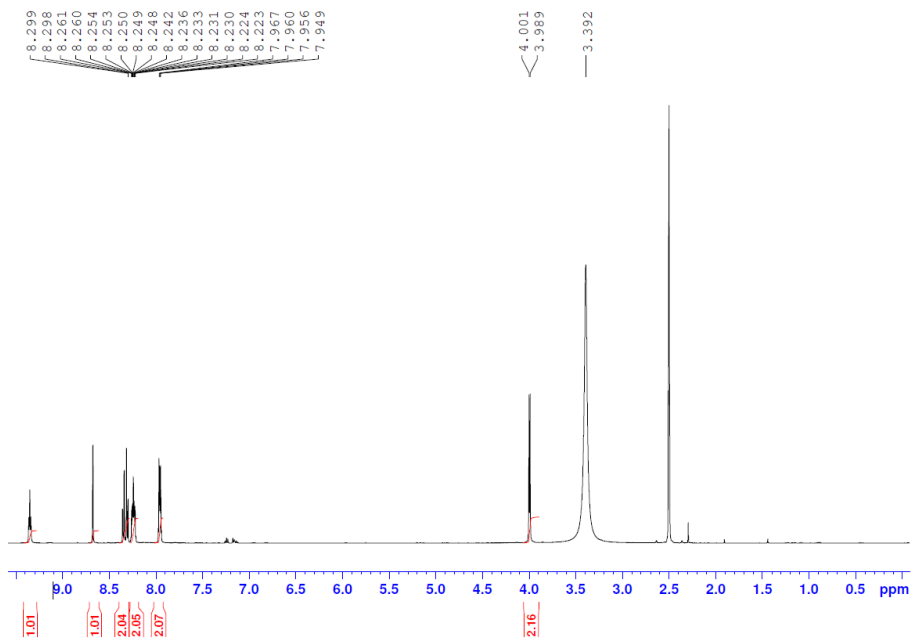

<sup>1</sup>H-NMR spectrum of 2

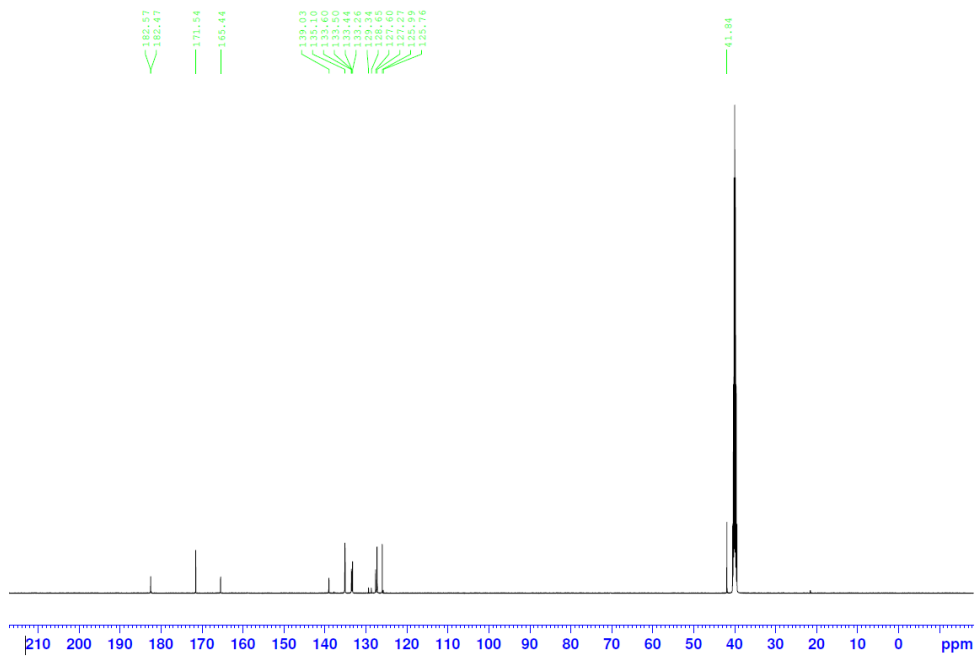

<sup>13</sup>C-NMR spectrum of 2

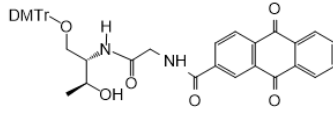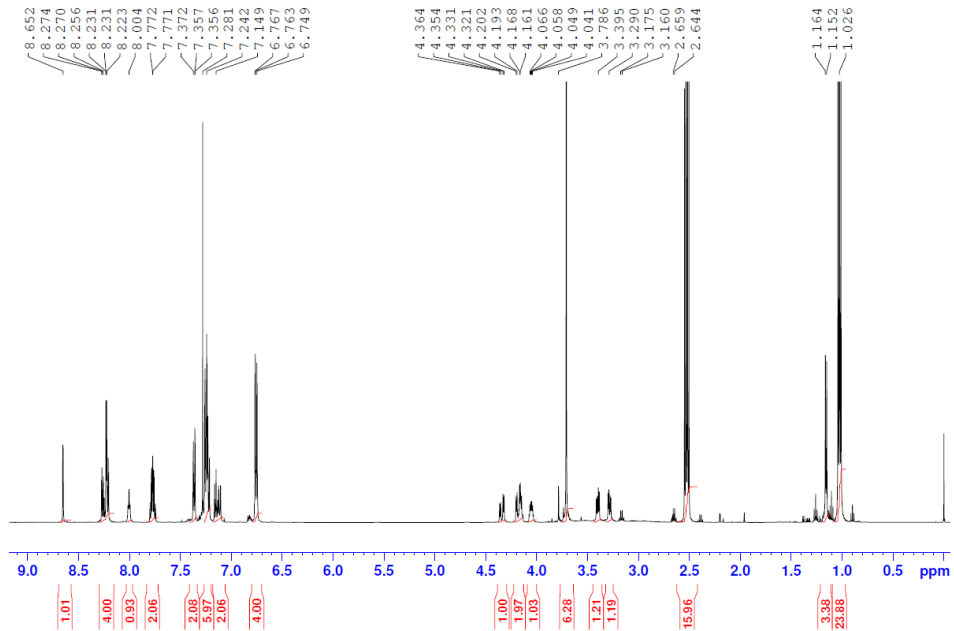

**<sup>1</sup>H-NMR spectrum of 3**

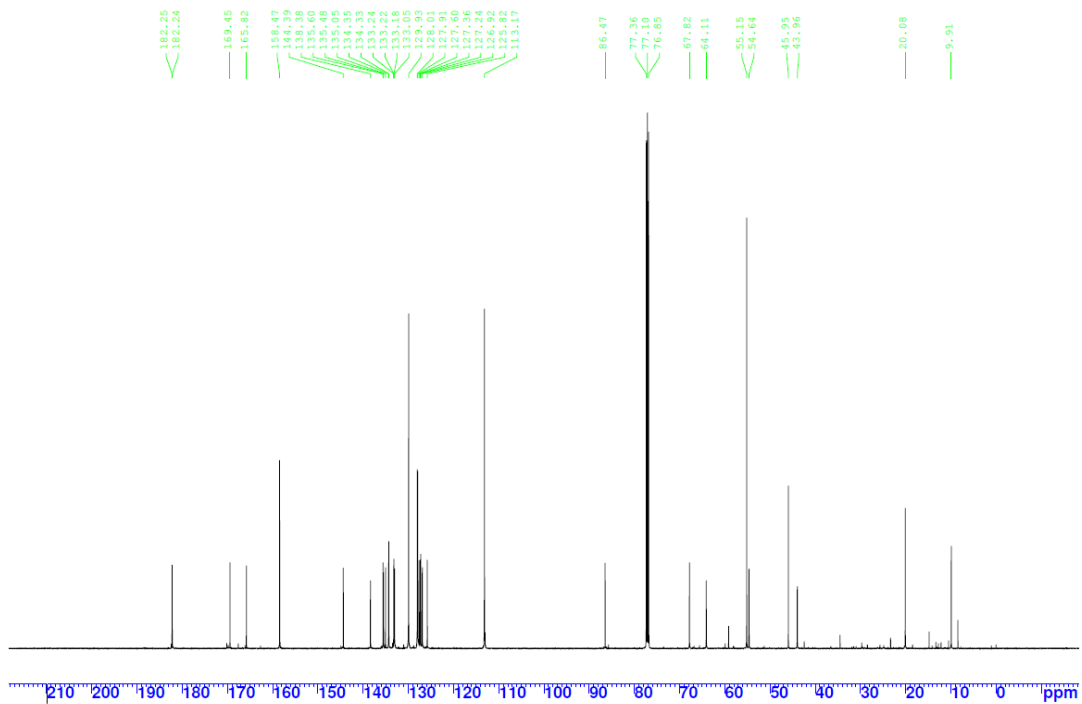

**<sup>13</sup>C-NMR spectrum of 3**

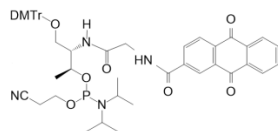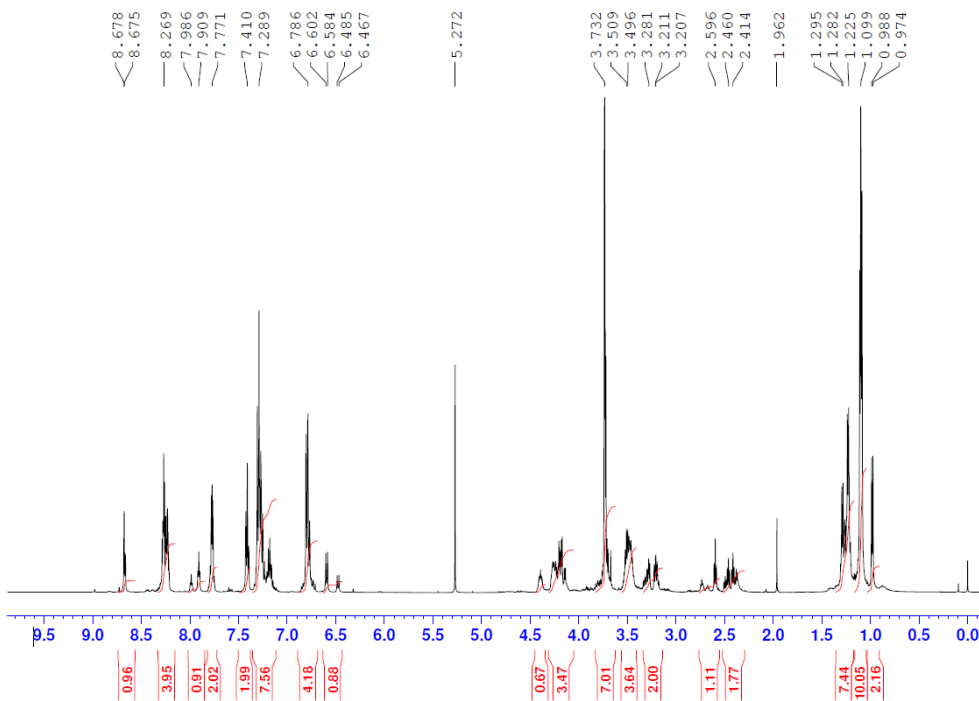

**<sup>1</sup>H-NMR spectrum of 4**

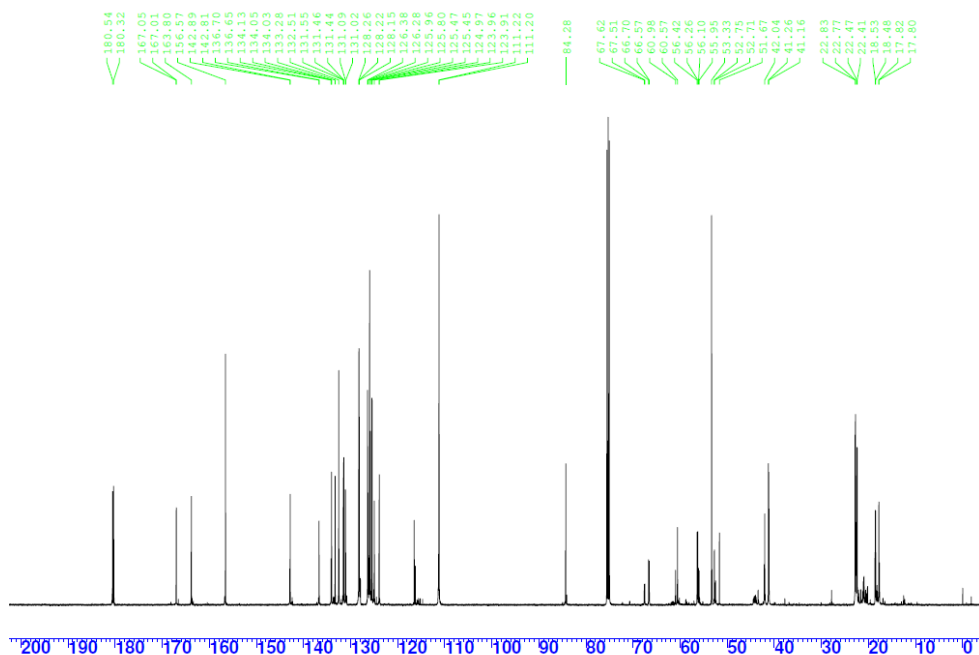

**<sup>13</sup>C-NMR spectrum of 4**

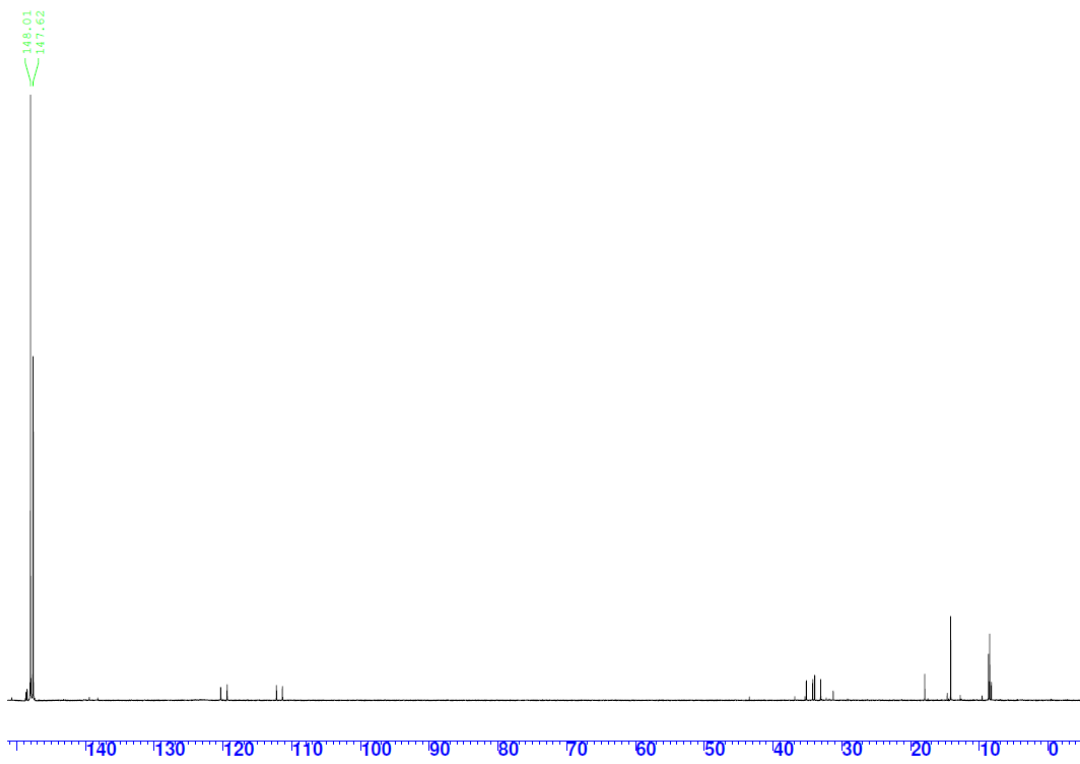

$^{31}\text{P}$ -NMR spectrum of **4**

### 3-2. Results of MALDI-TOF MS

| TFO linear probe | Theoretical | Observed |
|------------------|-------------|----------|
| 1F-T             | 4387.83     | 4393.81  |
| 2F-T             | 4884.97     | 4885.40  |
| 3F-T             | 5382.11     | 5383.68  |
| 4F-T             | 5879.25     | 5880.65  |
| 3L-T             | 5532.17     | 5528.68  |
| 3L-X             | 6977.42     | 6976.45  |
| 3L1gQ            | 7436.98     | 7434.67  |

#### 1F-T

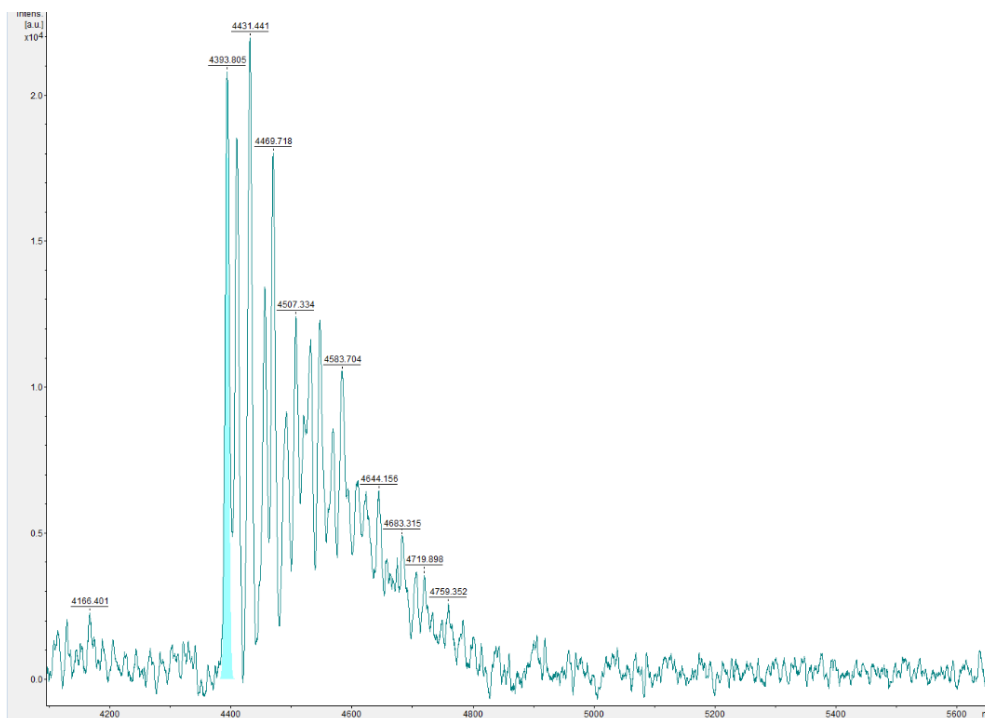

## 2F-T

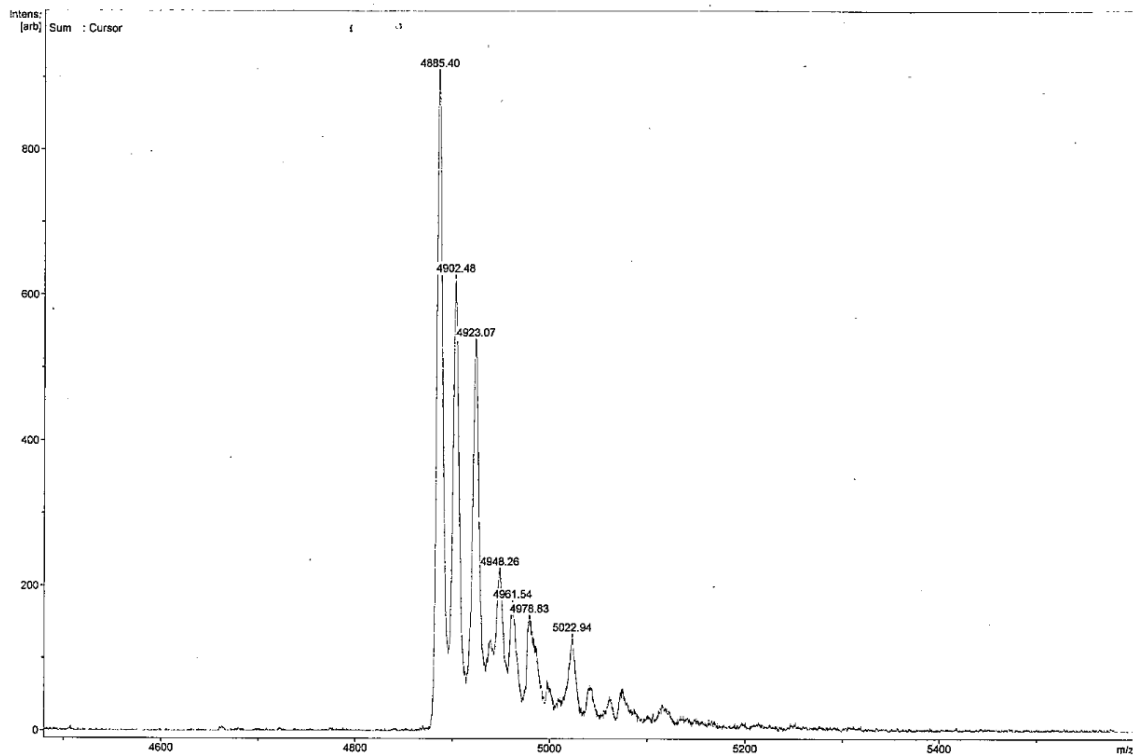

## 3F-T

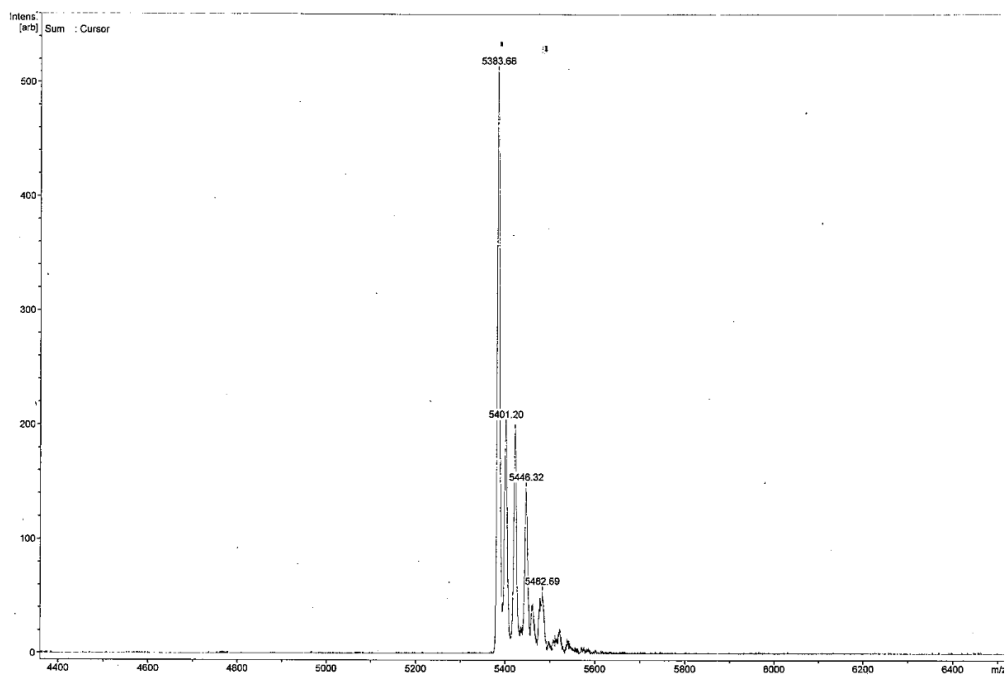



### 4F-T

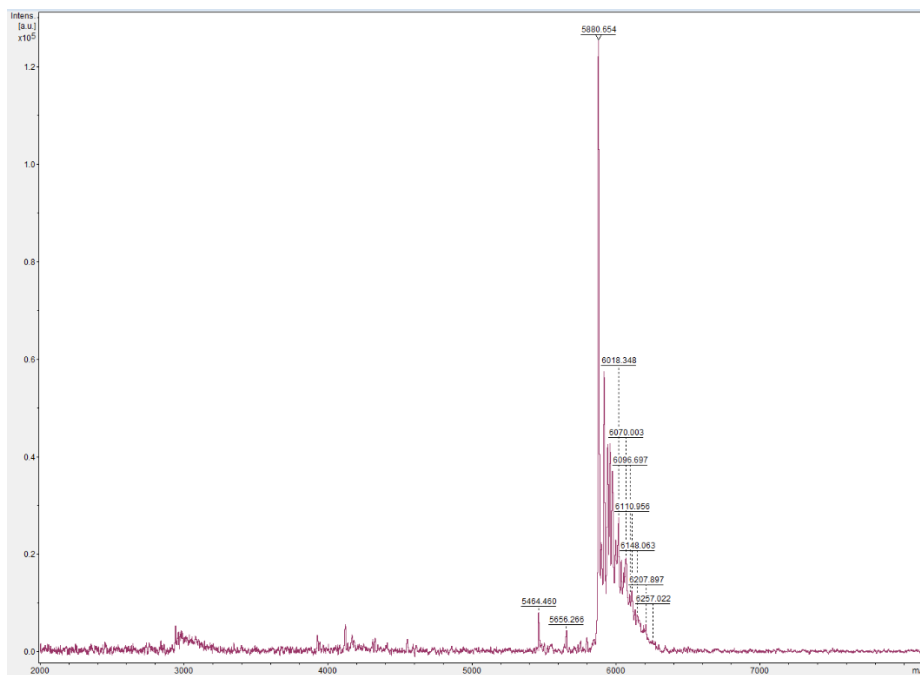

### 3L-T

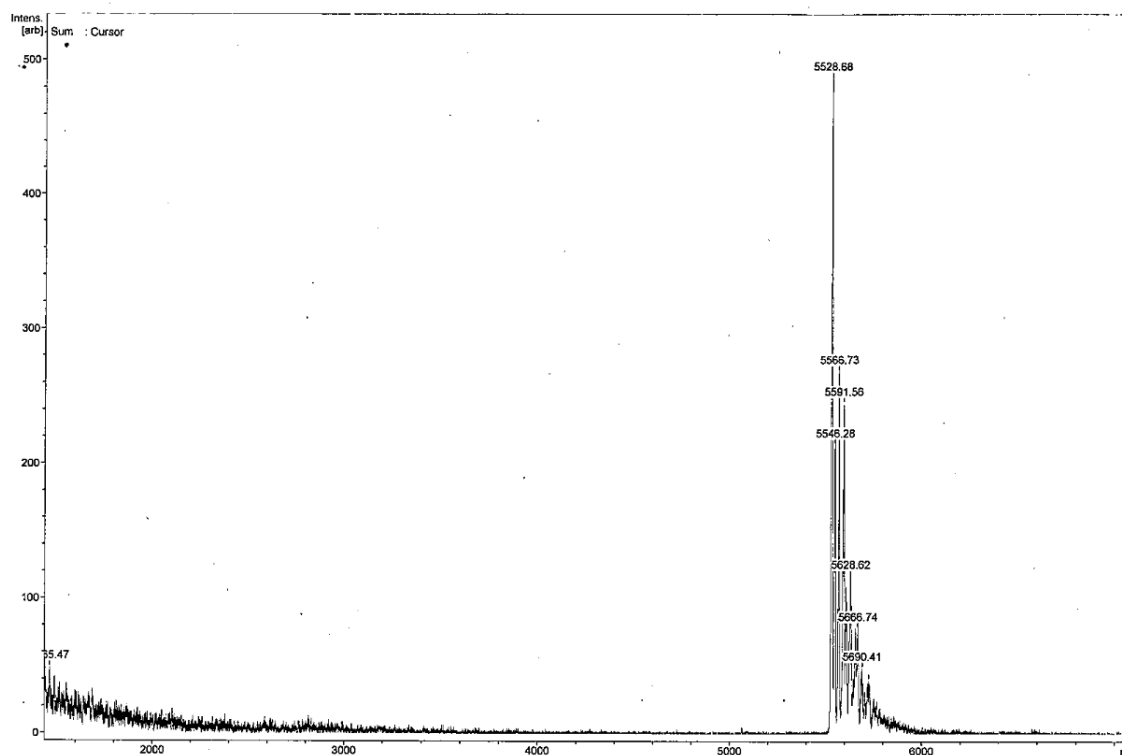

### 3L-X

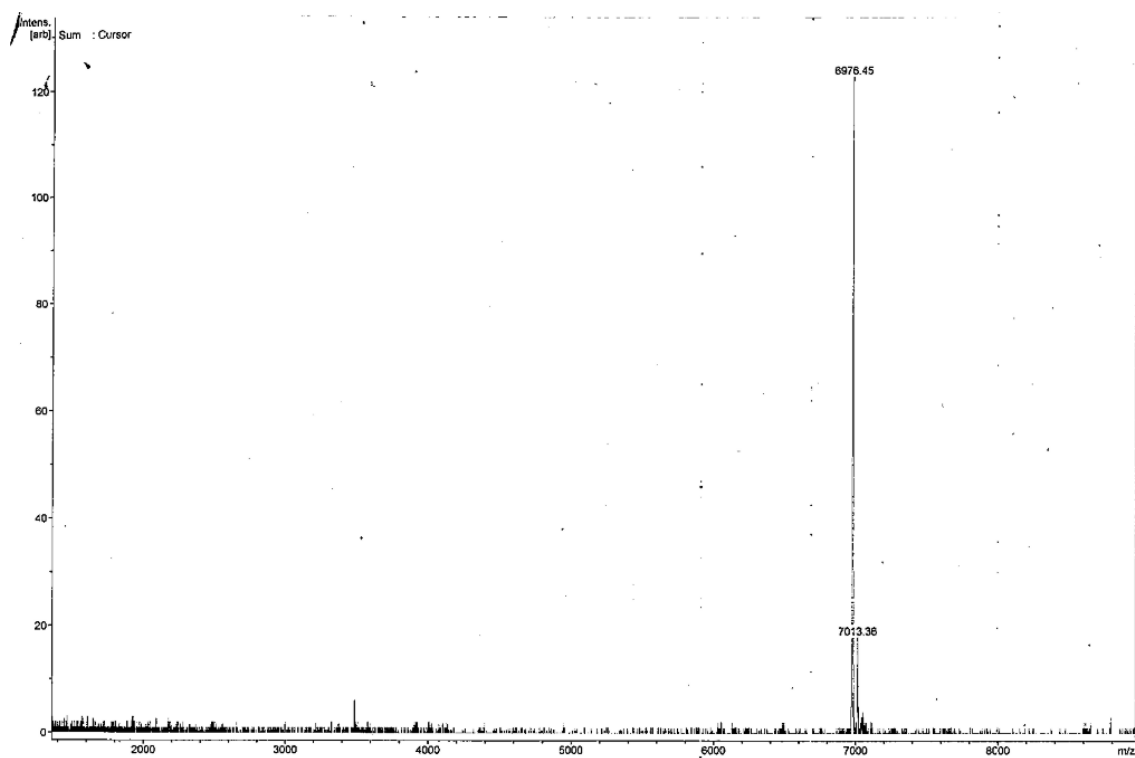

### 3L1gQ

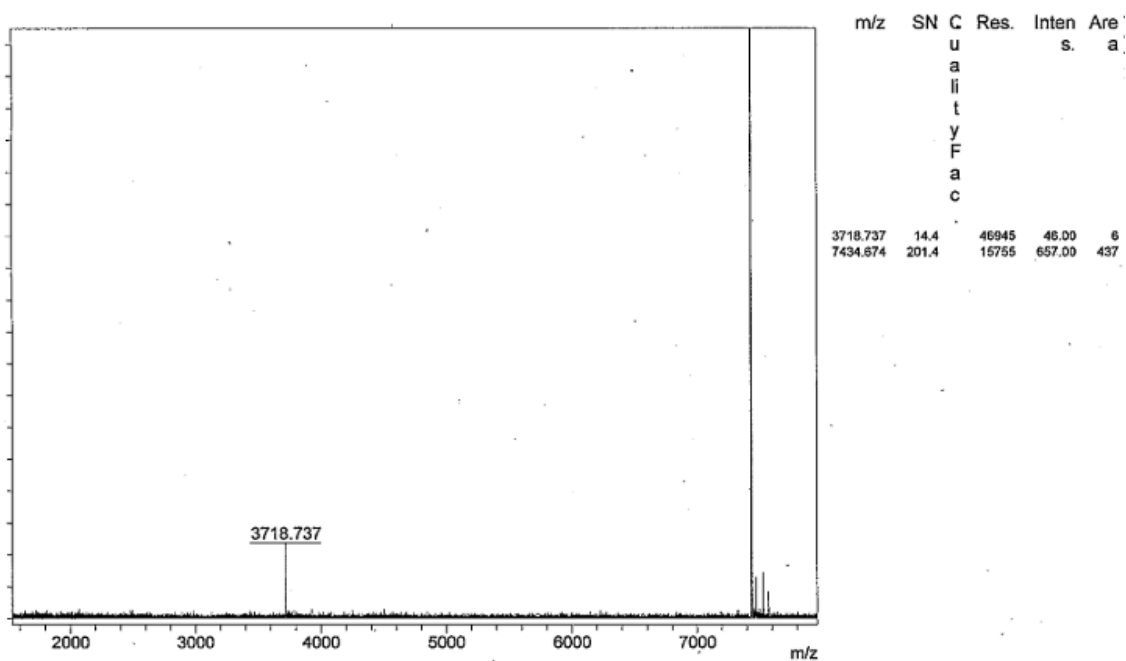

### 3-3. Results of HPLC:

Buffer A: 50 mM ammonium formate

Buffer B: mixture of 50 mM ammonium formate and acetonitrile (50:50, v/v)

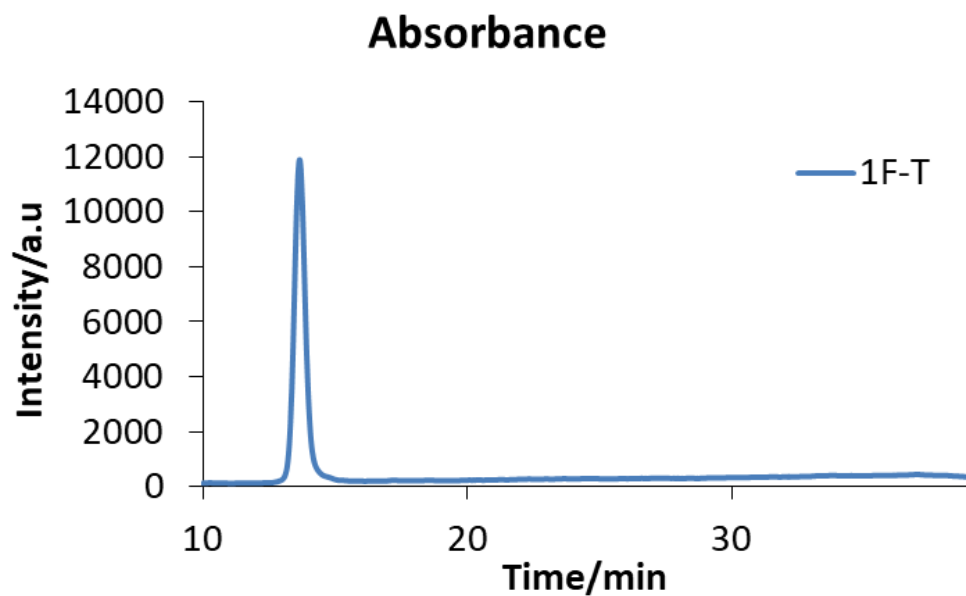

From 52% buffer B to 62% buffer B.

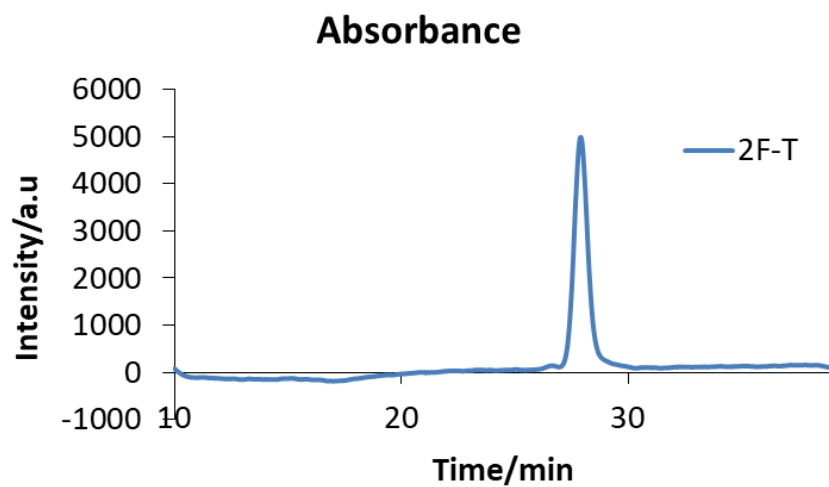

From 45% buffer B to 55% buffer B.

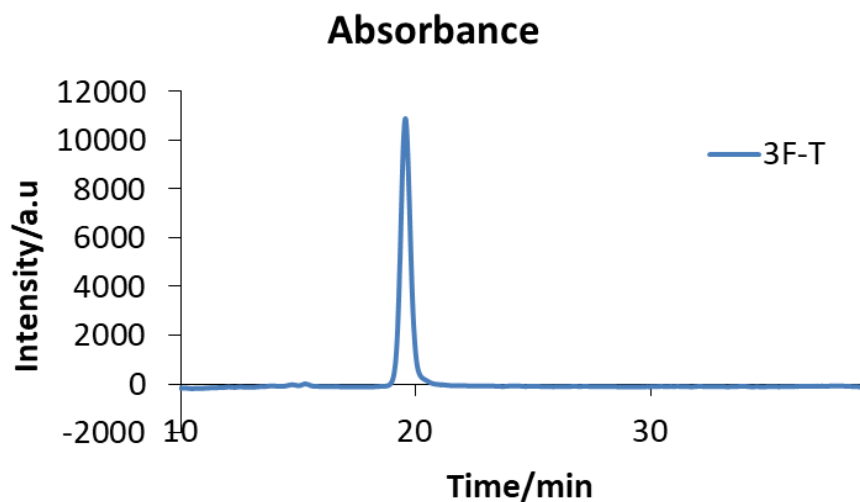

From 52% buffer B to 62% buffer B.

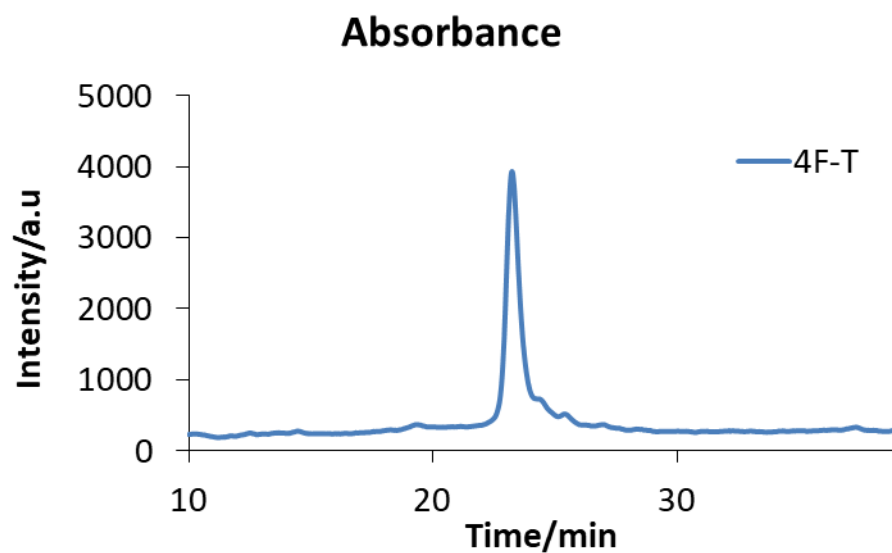

From 52% buffer B to 62% buffer B.

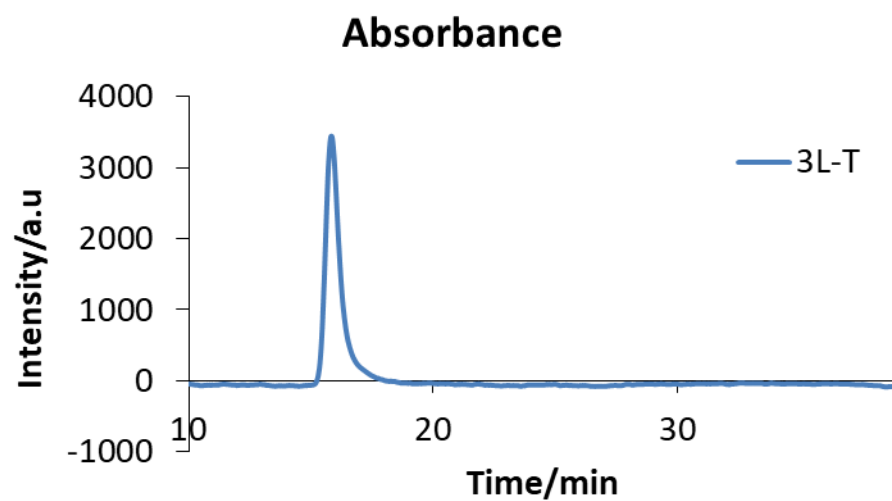

From 70% buffer B to 80% buffer B.

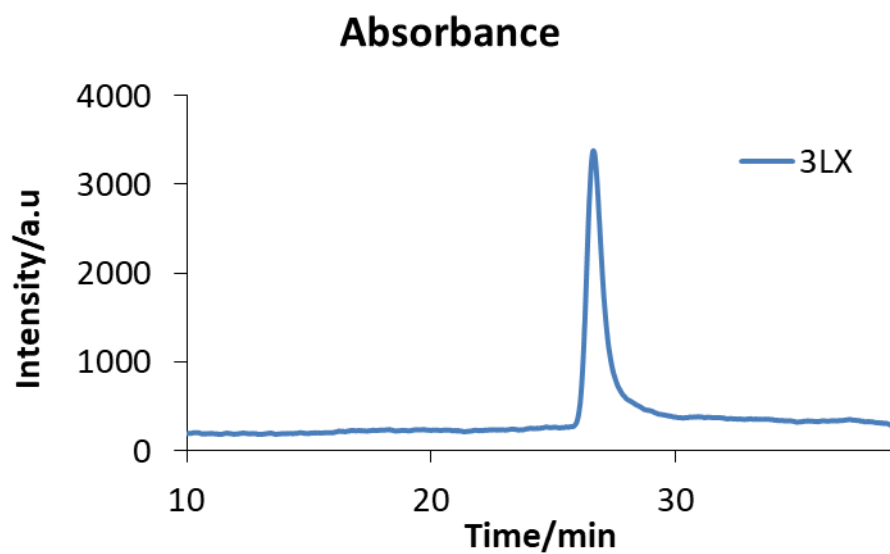

From 70% buffer B to 80% buffer B.

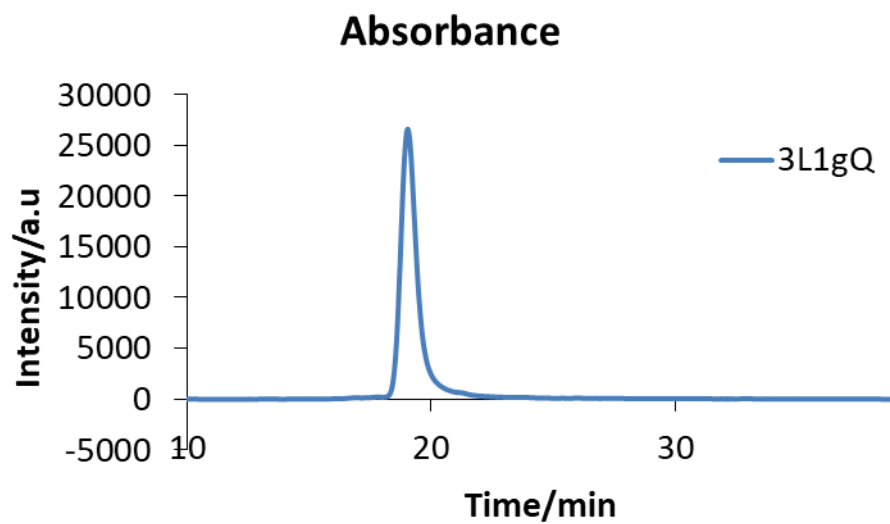

From 65% buffer B to 75% buffer B.

### 3-4 Sequence of plasmid

Orange font designates Xho I restriction site and gray indicates sites complementary to forward and reverse primers used for PCR.

NNNNNNNNNNNGCTTATGGACACACCGAGGANGTCATCAAGGAGTTCATGCAGTTCAAGGTGCGCATGGAGGGCTCCGTG  
AACGGCCACTACTTCGAGATCGAGGGCGAGGGCGAGGGCAAGCCCTACGAGGGCACCCAGACCCGCAAGCTGCAGGTGACC  
AAGGGCGGCCCTGCCCTTCGCCTGGGACATCCTGTCCCCCAGTTCCAGTACGGCTCCAAGGCCTACGTGAAGCACCCCGCC  
GACATCCCCGACTACATGAAGCTGTCTTCCCCGAGGGCTTCACTGGGAGCGCTCCATGAAGTTCGAGGACGGCGGGCGTGGT  
GGAGGTGCAGCAGGACTCCTCCCTGCAGGACGGCACCTTCATCTACAAGGTGAAGTTCAAGGGCGTGAAGTTCCTCCCGCCGACG  
GCCCCGTAATGCAGAAGAAGACTGCCGGCTGGGAGCCCTCCACCGAGAAGCTGTACCCCCAGGACGGCGGTGCTGAAGGGCGA  
GATCTCCACGCCCTGAAGCTGAAGGACGGCGGCCACTACACCTGCGACTTCAAGACCGTGTACAAGGCCAAGAAGCCCGTGC  
AGTGCCCGGCAACCACTACGTGGACTCCAAGCTGGACATCACCAACCACAACGAGGACTACACCGTGGTGGAGCAGTACGAG  
CACGCCGAGGCCCGCACTCCGGCTCCAGTAGGAATTCTGCAGATATCCAGCACAGTGGCGGCCGCTCGAGGTCACCCATTG  
AACAAAACTCATCTCAGAAGAGGATCTGAATATGCATACCGGTCATCATCACCATCACCATTGAGTTTAAACCCGCTGATCAGCC  
TCGACTGTGCCTTCTAGTTGCCAGCCATCTGTTGTTTGCCCCTCCCCGTCCTTCCCTTGACCCTGGAAGGTGCCACTCCACTGT  
CCTTTCCTAATAAAATGAGGAAATTGCATCGCATTGTCTGAGTNGTGTATTCTATTCTGGGGGGTGGGGGTTGGGGCNNNNCA  
GCAANGGNNNNNATTGGGAAGACAATANCNNNNNTGCTGGGGANGCNGTGGGNCTCTANNGNNTTCNGNAGNCGAANGA  
ANCANNCTGGGGGNNNNNANGGGNGNNNNNNNNNNNNNNNNNNNGCNNTGNTNNNNCNGN
